# Supplementary material for: Investigation of the Lewis acidic behaviour of an oxygen-bridged planarized triphenylborane toward amines and the properties of their Lewis acid–base adducts
Source: Royal Society of Chemistry journal article supplement (doi:10.1039/c8dt00128f), 2019-01-01
Supplement: c8dt00128f1.pdf [file c8dt00128f1.pdf]

# Investigation of Lewis acidic behaviour of an oxygen-bridged planarized triphenylborane toward amines and properties of their Lewis acid-base adducts

Yuichi Kitamoto,<sup>\*,a</sup> Fumiaki Kobayashi,<sup>b</sup> Takatsugu Suzuki,<sup>b</sup> Yasuo Miyata,<sup>b</sup> Hiroshi Kita,<sup>b</sup> Kenji Funaki,<sup>c</sup> Shuichi Oi<sup>\*,a</sup>

<sup>a</sup> New Industry Creation Hatchery Center, Tohoku University, 6-6-11 Aramaki-Aoba, Aoba-ku, Sendai 980-8579, Japan. E-mail: kitamoto@orgsynth.che.tohoku.ac.jp, oishu@aporg.che.tohoku.ac.jp

<sup>b</sup> Advanced Technology Center, Corporate R&D Headquarters, Konica Minolta, Inc., 2970 Ishikawa-Machi, Hachioji-shi, Tokyo 192-8505, Japan

<sup>c</sup> Department of Biomolecular Engineering, Graduate School of Engineering, Tohoku University, 6-6-11 Aramaki-Aoba, Aoba-ku, Sendai 980-8579, Japan

## Supplementary Information

### Contents:

|                                           |       |     |
|-------------------------------------------|-------|-----|
| 1. UV-vis absorption study                | ..... | S2  |
| 2. <sup>1</sup> NMR spectroscopy study    | ..... | S6  |
| 3. X-ray crystallographic analysis        | ..... | S7  |
| 4. <sup>11</sup> B NMR spectroscopy study | ..... | S9  |
| 5. Theoretical calculation                | ..... | S10 |
| 6. Transient photoluminescent decay study | ..... | S31 |
| 7. References                             | ..... | S33 |

## 1. UV-vis absorption study

The binding constant ( $K$ ) of oxaplanarborane **1** with pyridine, DMAP, or quinuclidine (the stoichiometry of **1**·amine is 1:1 ratio) is expressed as follow.

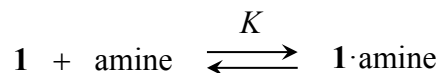

$$K = \frac{[\mathbf{1} \cdot \text{amine}]}{[\mathbf{1}][\text{amine}]}$$

$$\rightarrow K = \frac{[\mathbf{1} \cdot \text{amine}]}{([\mathbf{1}]_0 - [\mathbf{1} \cdot \text{amine}])([\text{amine}]_0 - [\mathbf{1} \cdot \text{amine}])}$$

The concentration of **1**·amine is expressed as follows.

$$([\mathbf{1}]_0 - [\mathbf{1} \cdot \text{amine}])([\text{amine}]_0 - [\mathbf{1} \cdot \text{amine}])K = [\mathbf{1} \cdot \text{amine}]$$

$$\rightarrow [\mathbf{1} \cdot \text{amine}]^2 - ([\mathbf{1}]_0 + [\text{amine}]_0 + 1/K)[\mathbf{1} \cdot \text{amine}] + [\mathbf{1}]_0[\text{amine}]_0 = 0$$

$$\rightarrow [\mathbf{1} \cdot \text{amine}] = \frac{([\mathbf{1}]_0 + [\text{amine}]_0 + 1/K) - \sqrt{([\mathbf{1}]_0 + [\text{amine}]_0 + 1/K)^2 - 4[\mathbf{1}]_0[\text{amine}]_0}}{2} \quad (1)$$

The binding constant  $K$  can be calculated by fitting the experimental data to the above 1:1 binding model according to the literature method.<sup>S1,S2</sup>

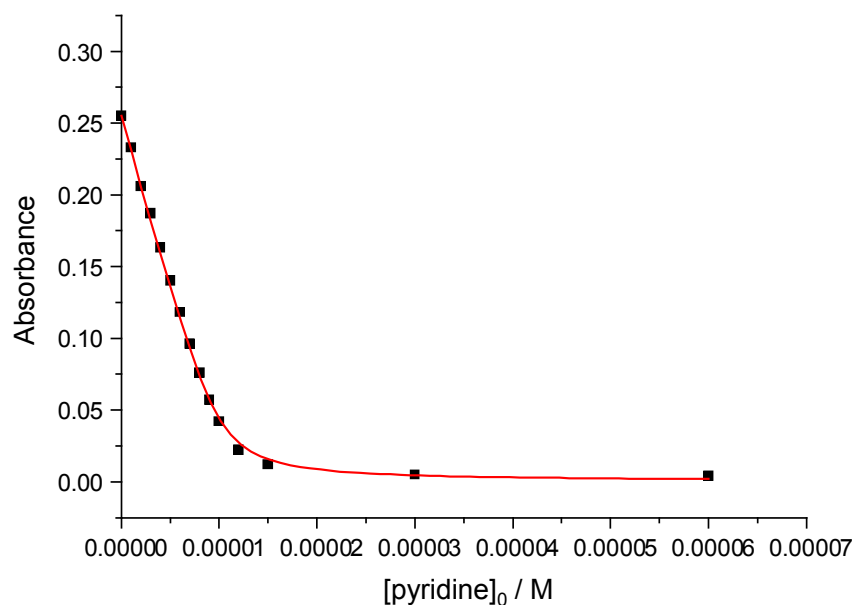

**Figure S1** The absorbance changes of **1** at 338 nm ( $1 \times 10^{-5}$  M, in cyclohexane) upon addition of pyridine at 23 °C. The fitting curve was obtained by using eq. 1. The binding constant  $K$  of **1**·pyridine was calculated to be  $2.7(\pm 0.21) \times 10^6 \text{ M}^{-1}$  ( $R^2 = 0.996$ ).

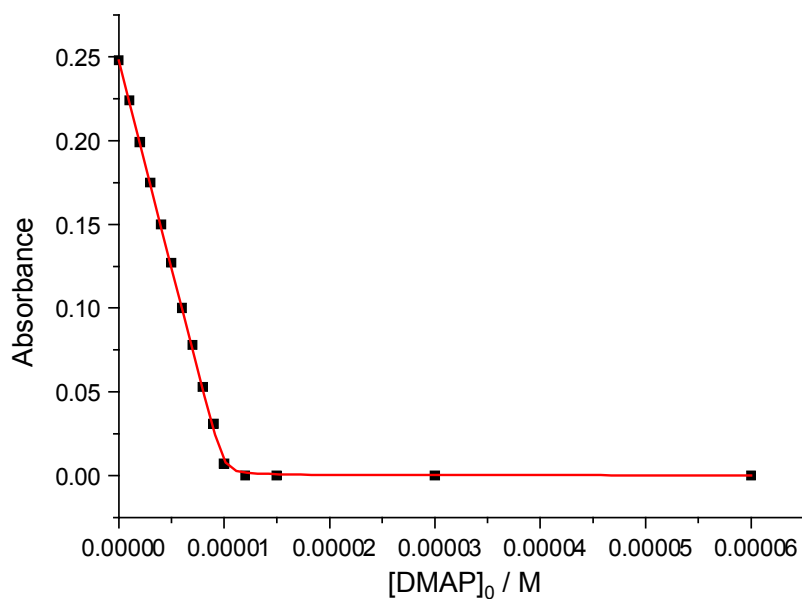

**Figure S2** The absorbance changes of **1** at 338 nm ( $1 \times 10^{-5}$  M, in cyclohexane) upon addition of DMAP at 23 °C. The fitting curve was obtained by using eq. 1. The binding constant  $K$  of **1**·DMAP was calculated to be  $6.6(\pm 1.9) \times 10^7 \text{ M}^{-1}$  ( $R^2 = 0.999$ ).

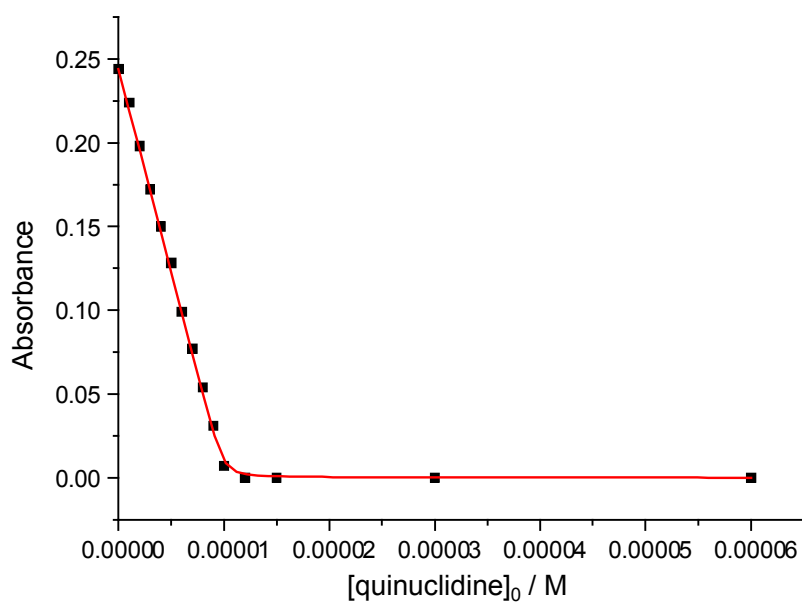

**Figure S3** The absorbance changes of **1** at 338 nm ( $1 \times 10^{-5}$  M, in cyclohexane) upon addition of quinuclidine at 23 °C. The fitting curve was obtained by using eq. 1. The binding constant  $K$  of **1**·quinuclidine was calculated to be  $5.3(\pm 2.2) \times 10^7 \text{ M}^{-1}$  ( $R^2 = 0.998$ ).

The binding constant ( $K_1$ ) of **1** with DABCO (the stoichiometry of **1**·DABCO is 2:1 ratio, i.e., **1**<sub>2</sub>·DABCO) is expressed as follow.

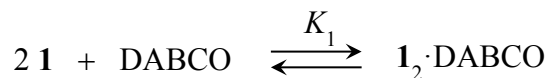

$$K_1 = \frac{[\mathbf{1}_2 \cdot \text{DABCO}]}{[\mathbf{1}]^2 [\text{DABCO}]}$$

$$\rightarrow K_1 = \frac{[\mathbf{1}_2 \cdot \text{DABCO}]}{([\mathbf{1}]_0 - 2[\mathbf{1}_2 \cdot \text{DABCO}])^2 ([\text{DABCO}]_0 - [\mathbf{1}_2 \cdot \text{DABCO}])}$$

$$\rightarrow \frac{1}{([\mathbf{1}]_0 - 2[\mathbf{1}_2 \cdot \text{DABCO}])^2} = K_1 \left( \frac{[\text{DABCO}]_0}{[\mathbf{1}_2 \cdot \text{DABCO}]} - 1 \right) \quad (\text{S1})$$

The concentration of **1**<sub>2</sub>·DABCO ( $[\mathbf{1}_2 \cdot \text{DABCO}]$ ) can be expressed by eq. S2, where  $Abs$  and  $Abs_0$  represent the absorbance of **1** in the presence and absence of DABCO, respectively, and  $Abs_\infty$  represents the absorbance of **1**<sub>2</sub>·DABCO.

$$2[\mathbf{1}_2 \cdot \text{DABCO}] = [\mathbf{1}]_0 \frac{Abs_0 - Abs}{Abs_0 - Abs_\infty}$$

$$\rightarrow [\mathbf{1}_2 \cdot \text{DABCO}] = \frac{[\mathbf{1}]_0 B}{2}, \text{ where } B = \frac{Abs_0 - Abs}{Abs_0 - Abs_\infty} \quad (\text{S2})$$

To calculate the  $K_1$  value, eq. 2 can be derived from eqs. S1 and S2 according to the literature derivation.<sup>S3,S4</sup>

$$\frac{1}{([\mathbf{1}]_0 - [\mathbf{1}]_0 B)^2} = K_1 \left( \frac{2[\text{DABCO}]_0}{[\mathbf{1}]_0 B} - 1 \right)$$

$$\rightarrow \frac{1}{(1_0 - B)^2} = K_1 \left( \frac{2[\text{DABCO}]_0}{[\mathbf{1}]_0 B} - 1 \right) [\mathbf{1}]_0^2$$

$$\rightarrow \frac{1}{(1_0 - B)^2} = K_1 [\mathbf{1}]_0 \left( \frac{2[\text{DABCO}]_0}{B} - [\mathbf{1}]_0 \right) \quad (2)$$

As shown in Figure S4, the linear plot of  $(1-B)^{-2}$  versus  $[\text{DABCO}]_0 \cdot B^{-1}$  is obtained according to the literature method.<sup>S3,S4</sup>

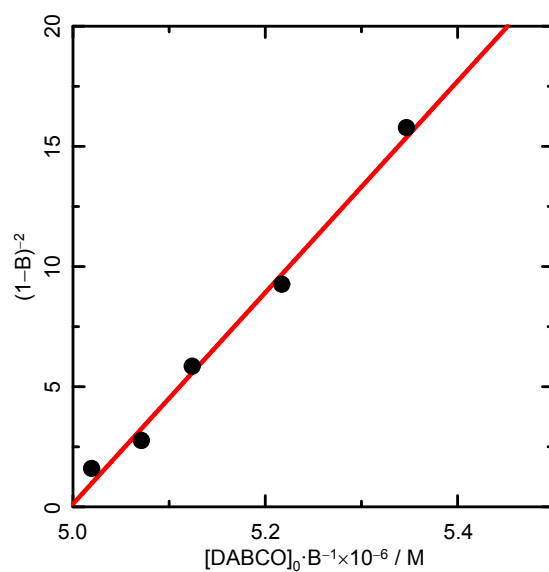

**Figure S4** The absorbance changes of **1** at 338 nm ( $1 \times 10^{-5}$  M, in cyclohexane) upon addition of DABCO at 23 °C. The liner plot was obtained by using eq. 2. The binding constant  $K_1$  of **1**<sub>2</sub>·DABCO was calculated to be  $2.2(\pm 0.11) \times 10^{12} \text{ M}^{-2}$  ( $R^2 = 0.992$ ).

## 2. $^1\text{H}$ NMR spectroscopy study

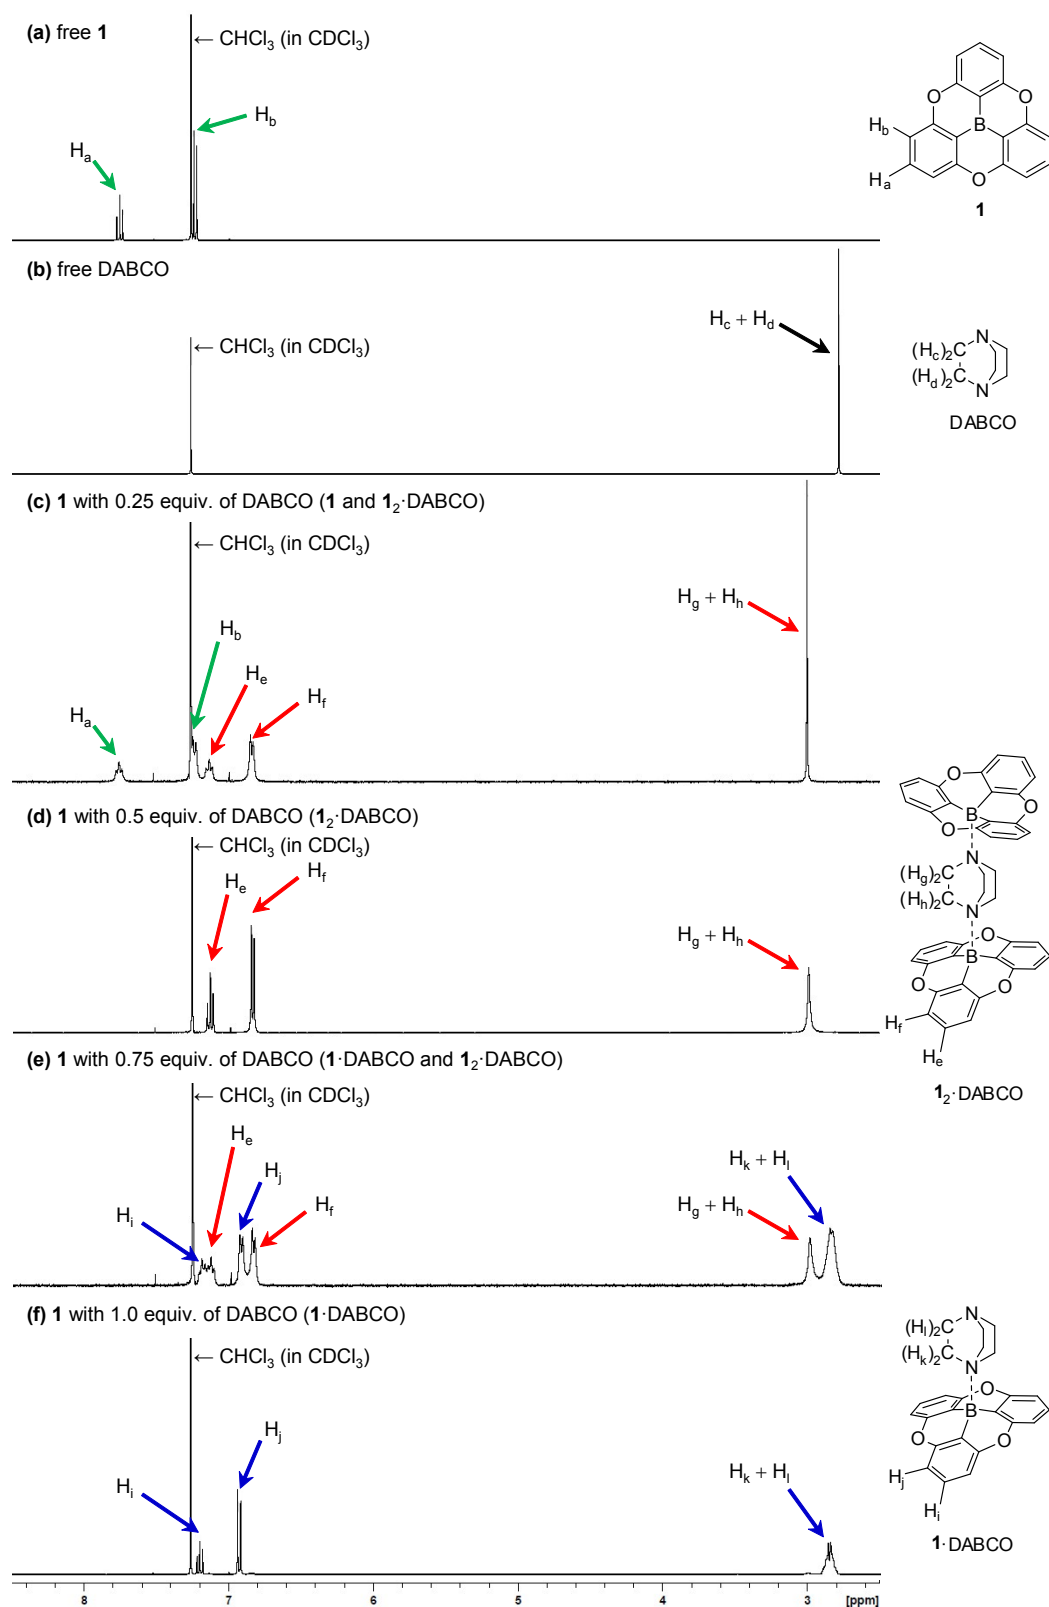

**Figure S5**  $^1\text{H}$  NMR spectra of a mixture of **1** ( $3.9 \times 10^{-3}$  M) and DABCO at 23 °C in  $\text{CDCl}_3$ . Tetramethylsilane was used as an internal standard (0 ppm).

### 3. X-ray crystallographic analysis

**Table S1** Crystallographic data for **1**·DMAP, **1**·quinuclidine, and **1**<sub>2</sub>·DABCO

|                                                                             | <b>1</b> ·DMAP                                                               | <b>1</b> ·quinuclidine·(C <sub>6</sub> H <sub>12</sub> ) <sub>2</sub> <sup>a</sup> | <b>1</b> <sub>2</sub> ·DABCO·CHCl <sub>3</sub> <sup>b</sup>      |
|-----------------------------------------------------------------------------|------------------------------------------------------------------------------|------------------------------------------------------------------------------------|------------------------------------------------------------------|
| Empirical formula                                                           | C <sub>50</sub> H <sub>38</sub> B <sub>2</sub> N <sub>4</sub> O <sub>6</sub> | C <sub>37</sub> H <sub>46</sub> BNO <sub>3</sub>                                   | C <sub>22</sub> H <sub>16</sub> BCl <sub>3</sub> NO <sub>3</sub> |
| Formula weight                                                              | 812.46                                                                       | 563.56                                                                             | 459.52                                                           |
| Crystal system                                                              | Monoclinic                                                                   | Orthorhombic                                                                       | Monoclinic                                                       |
| Space group                                                                 | <i>P</i> 2 <sub>1</sub> / <i>n</i>                                           | <i>P</i> mn2 <sub>1</sub>                                                          | <i>C</i> 2/ <i>c</i>                                             |
| <i>a</i> / Å                                                                | 14.9464(15)                                                                  | 17.996(3)                                                                          | 23.783(3)                                                        |
| <i>b</i> / Å                                                                | 14.1675(14)                                                                  | 8.2540(16)                                                                         | 9.9498(10)                                                       |
| <i>c</i> / Å                                                                | 19.4407(19)                                                                  | 10.502(3)                                                                          | 18.2611(19)                                                      |
| <i>α</i> / °                                                                | 90                                                                           | 90                                                                                 | 90                                                               |
| <i>β</i> / °                                                                | 107.4270(10)                                                                 | 90                                                                                 | 113.2150(10)                                                     |
| <i>γ</i> / °                                                                | 90                                                                           | 90                                                                                 | 90                                                               |
| <i>V</i> / Å <sup>3</sup>                                                   | 3927.7(7)                                                                    | 1560.0(6)                                                                          | 3917.4(7)                                                        |
| <i>Z</i>                                                                    | 4                                                                            | 2                                                                                  | 8                                                                |
| F(000)                                                                      | 1696                                                                         | 608                                                                                | 1880                                                             |
| <i>T</i> / K                                                                | 100(2)                                                                       | 223(2)                                                                             | 100(2)                                                           |
| <i>ρ</i> <sub>calc</sub> / gcm <sup>-3</sup>                                | 1.374                                                                        | 1.200                                                                              | 1.537                                                            |
| Reflections collected                                                       | 22063                                                                        | 8774                                                                               | 11025                                                            |
| Independent reflections                                                     | 8878                                                                         | 3565                                                                               | 4457                                                             |
|                                                                             | [ <i>R</i> <sub>int</sub> = 0.0282]                                          | [ <i>R</i> <sub>int</sub> = 0.0257]                                                | [ <i>R</i> <sub>int</sub> = 0.0199]                              |
| <i>R</i> <sub>1</sub> , <i>wR</i> <sub>2</sub> ( <i>I</i> > 2σ( <i>I</i> )) | 0.0413, 0.1226                                                               | 0.0802, 0.2337                                                                     | 0.0444, 0.1192                                                   |
| <i>R</i> <sub>1</sub> , <i>wR</i> <sub>2</sub> (all data)                   | 0.0600, 0.1400                                                               | 0.0962, 0.2548                                                                     | 0.0474, 0.1218                                                   |
| Goodness-of-fit on <i>F</i> <sup>2</sup>                                    | 0.980                                                                        | 1.019                                                                              | 1.042                                                            |
| Largest diff. peak and hole / e·Å <sup>3</sup>                              | 0.355 and -0.250                                                             | 0.420 and -0.317                                                                   | 0.692 and -0.627                                                 |

<sup>a</sup> Cyclohexane molecule (C<sub>6</sub>H<sub>12</sub>) was included. <sup>b</sup> Chloroform molecule (CHCl<sub>3</sub>) was included.

The data of **1**·quinuclidine have B Alert in the checkCIF program because the cyclohexane molecule included into the crystal shows severely disordered structure and it is also difficult to assign the hydrogen atoms of the cyclohexane molecule.

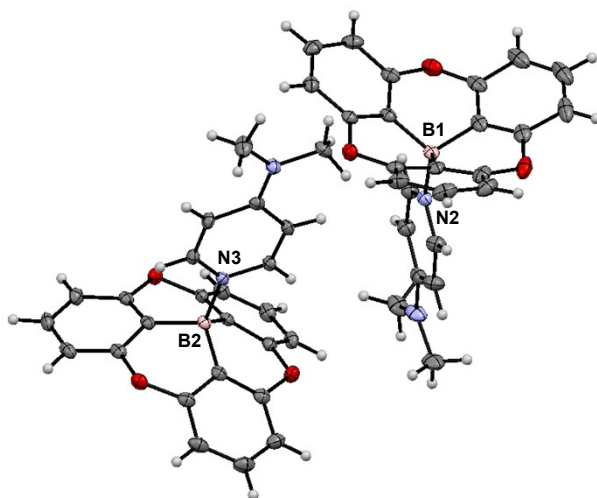

**Figure S6** Thermal ellipsoid plot drawing of **1·DMAP** (50% probability ellipsoids). Two crystallographically independent molecules were observed. Selected lengths (Å): N2–B1, 1.6195(19); N3–B2, 1.6179(19). The summation of the  $C_{\text{ipso}}\text{--B--}C_{\text{ipso}}$  angles is  $322.1^\circ$  for B1 and  $322.1^\circ$  for B2.



#### 4. $^{11}\text{B}$ NMR spectroscopy study

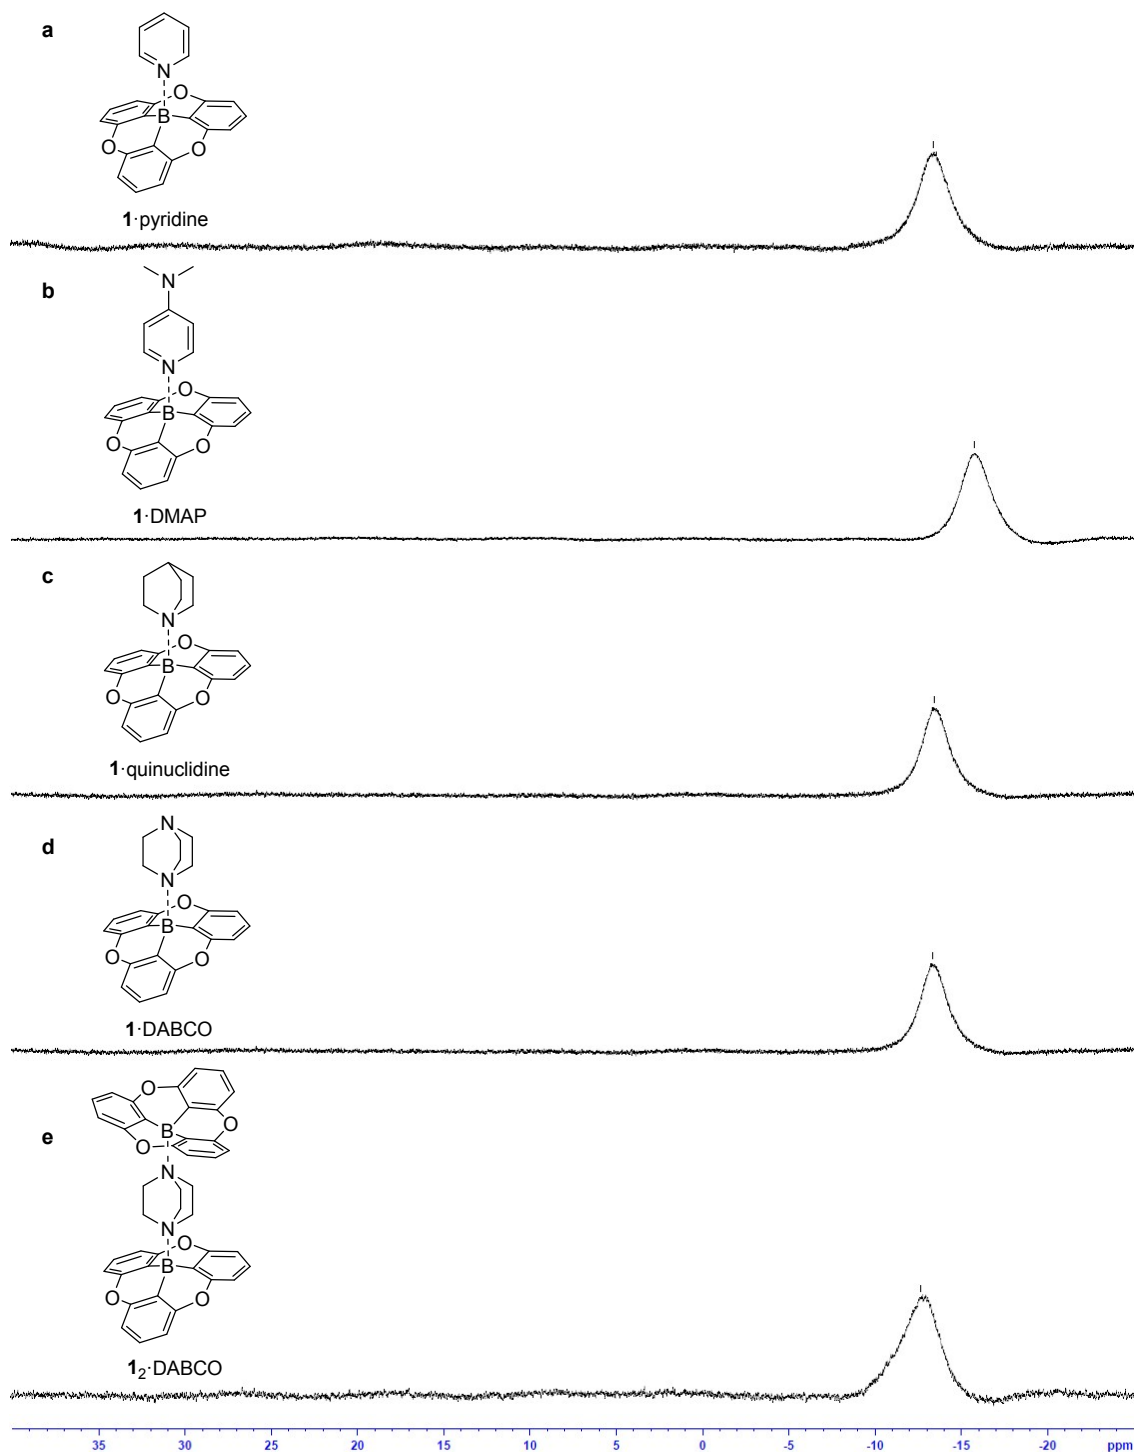

**Figure S7**  $^{11}\text{B}$  NMR spectra of  $1_n$ ·amine (DABCO:  $n = 1, 2$ ; the other amine:  $n = 1$ ) at 23 °C in  $\text{CDCl}_3$  (Table 1).  $\text{BF}_3 \cdot \text{OEt}_2$  was used as an external standard (0 ppm).

## 5. Theoretical calculation

To optimize molecular structures of **1**, **1**·pyridine, **1**·DMAP, **1**·quinuclidine, **1**<sub>2</sub>·DABCO, and **1**·DABCO at the ground state, DFT calculations were carried out using the Gaussian 09 package<sup>S5</sup> at the B3LYP/6-311G(d,p) level (in cyclohexane, PCM model). After the optimization, the TD-DFT calculations were also conducted at the B3LYP/6-311G(d,p) level (in cyclohexane, PCM model). The output views were obtained by using the GaussView version 5.0.<sup>S6</sup>

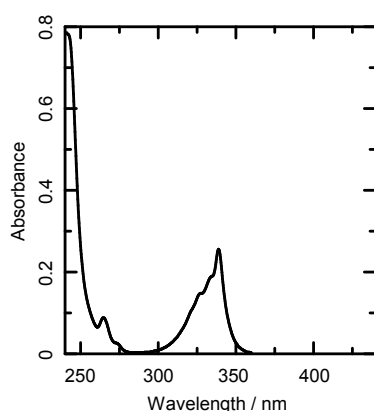

**Figure S8** Experimental UV-vis absorption spectrum of **1** ( $1 \times 10^{-5}$  M, in cyclohexane) in the absence of amine at 23 °C.

**Table S2** Calculated excitation energy ( $E$ ,  $\lambda$ ) and oscillator strength ( $f$ ) of **1** by DFT and TD-DFT at the B3LYP/6-311G(d,p) level (in cyclohexane, PCM model).

| Transition | $E$ / eV | $\lambda$ / nm | $f^a$  | Main CI coefficient $b$             |
|------------|----------|----------------|--------|-------------------------------------|
| 1          | 3.847    | 322            | 0.1074 | HOMO $\rightarrow$ LUMO 0.6939      |
|            | 3.847    | 322            | 0.1077 | HOMO-1 $\rightarrow$ LUMO 0.6939    |
| 2          | 4.661    | 266            | 0.0048 | HOMO-2 $\rightarrow$ LUMO -0.2377   |
|            |          |                |        | HOMO-1 $\rightarrow$ LUMO+2 -0.4607 |
|            |          |                |        | HOMO $\rightarrow$ LUMO+2 0.4619    |
| 3          | 4.871    | 255            | 0.0063 | HOMO-2 $\rightarrow$ LUMO 0.5344    |
|            |          |                |        | HOMO $\rightarrow$ LUMO+3 0.4258    |
|            | 4.871    | 255            | 0.0063 | HOMO-3 $\rightarrow$ LUMO 0.5344    |
|            |          |                |        | HOMO-1 $\rightarrow$ LUMO+3 0.4262  |

<sup>a</sup> Oscillator strength. <sup>b</sup> Coefficient of the wave function for each excitation.

**(Table S2 Continued)**

| Transition | $E / \text{eV}$ | $\lambda / \text{nm}$ | $f^a$  | Main CI coefficient $b$     |         |
|------------|-----------------|-----------------------|--------|-----------------------------|---------|
| 4          | 5.154           | 240                   | 0.7862 | HOMO-2 $\rightarrow$ LUMO   | -0.3823 |
|            |                 |                       |        | HOMO-1 $\rightarrow$ LUMO+1 | -0.1276 |
|            |                 |                       |        | HOMO $\rightarrow$ LUMO+2   | -0.1271 |
|            |                 |                       |        | HOMO $\rightarrow$ LUMO+3   | 0.5401  |
|            | 5.154           | 240                   | 0.7859 | HOMO-3 $\rightarrow$ LUMO   | -0.3825 |
|            |                 |                       |        | HOMO-1 $\rightarrow$ LUMO+2 | 0.1281  |
|            |                 |                       |        | HOMO-1 $\rightarrow$ LUMO+3 | 0.5397  |
|            |                 |                       |        | HOMO $\rightarrow$ LUMO+1   | -0.1276 |

<sup>a</sup> Oscillator strength. <sup>b</sup> Coefficient of the wave function for each excitation.

**Table S3** Calculated excitation energy of  $S_1$  ( $E_{S_1}$ ) and  $T_1$  ( $E_{T_1}$ ),  $\Delta(S_1-T_1)@S_0$ , and oscillator strength ( $f$ ) by DFT and TD-DFT at the B3LYP/6-311G(d,p) level (in cyclohexane, PCM model).<sup>a</sup>

| Compound                     | $E_{S_1} / \text{eV}$ | $E_{T_1} / \text{eV}$ | $\Delta(S_1-T_1)@S_0 / \text{eV}$ |
|------------------------------|-----------------------|-----------------------|-----------------------------------|
|                              | $f$                   | $f$                   |                                   |
| <b>1</b>                     | 3.847                 | 3.292                 | 0.554                             |
|                              | 0.1074                | 0                     |                                   |
| <b>1</b> ·pyridine           | 2.967                 | 2.952                 | 0.015                             |
|                              | 0.0006                | 0                     |                                   |
| <b>1</b> ·DMAP               | 3.711                 | 3.506                 | 0.205                             |
|                              | 0.0010                | 0                     |                                   |
| <b>1</b> ·Quinuclidine       | 4.584                 | 3.601                 | 0.984                             |
|                              | 0.0581                | 0                     |                                   |
| <b>1</b> <sub>2</sub> ·DABCO | 4.537                 | 3.597                 | 0.940                             |
|                              | 0.1047                | 0                     |                                   |
| <b>1</b> ·DABCO              | 4.577                 | 3.600                 | 0.977                             |
|                              | 0.0591                | 0                     |                                   |

<sup>a</sup> Based on the optimized geometry at the ground state ( $S_0$ ).

**Table S4** Calculated excitation energy ( $E$ ,  $\lambda$ ) and oscillator strength ( $f$ ) of **1**-pyridine by DFT and TD-DFT at the B3LYP/6-311G(d,p) level (in cyclohexane, PCM model).

| Transition | $E$ / eV | $\lambda$ / nm | $f^a$  | Main CI coefficient $b$     |         |
|------------|----------|----------------|--------|-----------------------------|---------|
| 1          | 2.967    | 418            | 0.0006 | HOMO $\rightarrow$ LUMO     | 0.7062  |
| 2          | 2.984    | 415            | 0.0012 | HOMO-1 $\rightarrow$ LUMO   | 0.7062  |
| 3          | 3.697    | 335            | 0.0012 | HOMO $\rightarrow$ LUMO+1   | 0.7054  |
| 4          | 3.743    | 331            | 0.0019 | HOMO-4 $\rightarrow$ LUMO   | 0.4750  |
|            |          |                |        | HOMO-2 $\rightarrow$ LUMO   | 0.4663  |
|            |          |                |        | HOMO-1 $\rightarrow$ LUMO+1 | 0.2340  |
| 5          | 3.847    | 322            | 0.0004 | HOMO-4 $\rightarrow$ LUMO   | -0.4772 |
|            |          |                |        | HOMO-2 $\rightarrow$ LUMO   | 0.5163  |
| 6          | 4.297    | 288            | 0.0009 | HOMO-5 $\rightarrow$ LUMO   | 0.7061  |
| 7          | 4.565    | 272            | 0.0119 | HOMO-3 $\rightarrow$ LUMO+1 | 0.6976  |
|            |          |                |        | HOMO-4 $\rightarrow$ LUMO+1 | -0.3732 |
|            |          |                |        | HOMO-2 $\rightarrow$ LUMO+1 | 0.5163  |
|            |          |                |        | HOMO $\rightarrow$ LUMO+2   | -0.2547 |
| 8          | 4.605    | 269            | 0.0527 | HOMO-4 $\rightarrow$ LUMO+1 | -0.2771 |
|            |          |                |        | HOMO $\rightarrow$ LUMO+2   | 0.5364  |
|            |          |                |        | HOMO $\rightarrow$ LUMO+3   | 0.1849  |
| 9          | 4.645    | 266            | 0.0478 | HOMO-1 $\rightarrow$ LUMO+2 | 0.5635  |
|            |          |                |        | HOMO-1 $\rightarrow$ LUMO+3 | -0.2630 |
|            |          |                |        | HOMO $\rightarrow$ LUMO+5   | 0.2002  |
| 10         | 4.836    | 256            | 0.0081 | HOMO-1 $\rightarrow$ LUMO+2 | 0.3525  |
|            |          |                |        | HOMO-1 $\rightarrow$ LUMO+3 | 0.4404  |
|            |          |                |        | HOMO $\rightarrow$ LUMO+4   | -0.4709 |
| 11         | 5.001    | 248            | 0.1644 | HOMO-6 $\rightarrow$ LUMO   | 0.6663  |
|            |          |                |        | HOMO-1 $\rightarrow$ LUMO+3 | -0.1520 |

<sup>a</sup>Oscillator strength. <sup>b</sup> Coefficient of the wave function for each excitation.

In comparison with the major excited states 7–11 having large oscillator strength, the excited states 1–6 show very smaller oscillator strength (Table S4).

**Table S5** Calculated excitation energy ( $E$ ,  $\lambda$ ) and oscillator strength ( $f$ ) of **1**-DMAP by DFT and TD-DFT at the B3LYP/6-311G(d,p) level (in cyclohexane, PCM model).

| Transition | $E$ / eV | $\lambda$ / nm | $f^a$  | Main CI coefficient $^b$    |         |
|------------|----------|----------------|--------|-----------------------------|---------|
| 1          | 3.711    | 334            | 0.0010 | HOMO $\rightarrow$ LUMO     | 0.7054  |
| 2          | 3.724    | 332            | 0.0027 | HOMO-1 $\rightarrow$ LUMO   | 0.7055  |
| 3          | 3.940    | 315            | 0.0017 | HOMO $\rightarrow$ LUMO+1   | 0.7059  |
| 4          | 4.613    | 269            | 0.0489 | HOMO $\rightarrow$ LUMO+2   | 0.5718  |
|            |          |                |        | HOMO $\rightarrow$ LUMO+3   | 0.2262  |
|            |          |                |        | HOMO-1 $\rightarrow$ LUMO+4 | 0.2117  |
| 5          | 4.670    | 265            | 0.0518 | HOMO-1 $\rightarrow$ LUMO+2 | 0.5261  |
|            |          |                |        | HOMO-1 $\rightarrow$ LUMO+3 | -0.2877 |
| 6          | 4.706    | 263            | 0.0119 | HOMO-5 $\rightarrow$ LUMO+1 | 0.5957  |
|            |          |                |        | HOMO-3 $\rightarrow$ LUMO+1 | 0.3008  |
| 7          | 4.808    | 258            | 0.0074 | HOMO-5 $\rightarrow$ LUMO+1 | -0.3124 |
|            |          |                |        | HOMO-3 $\rightarrow$ LUMO+1 | 0.6266  |
| 8          | 4.852    | 256            | 0.0288 | HOMO-1 $\rightarrow$ LUMO+2 | 0.3771  |
|            |          |                |        | HOMO-1 $\rightarrow$ LUMO+3 | 0.4118  |
|            |          |                |        | HOMO $\rightarrow$ LUMO+4   | -0.3970 |
| 9          | 4.876    | 254            | 0.7292 | HOMO-5 $\rightarrow$ LUMO+4 | 0.6466  |
|            |          |                |        | HOMO-1 $\rightarrow$ LUMO+3 | 0.1553  |
| 10         | 5.040    | 246            | 0.0045 | HOMO-6 $\rightarrow$ LUMO   | 0.6983  |
| 11         | 5.113    | 242            | 0.0850 | HOMO-1 $\rightarrow$ LUMO+3 | 0.3312  |
|            |          |                |        | HOMO $\rightarrow$ LUMO+4   | 0.4923  |
| 12         | 5.166    | 240            | 0.1814 | HOMO-1 $\rightarrow$ LUMO+3 | -0.2722 |
|            |          |                |        | HOMO $\rightarrow$ LUMO+5   | 0.5771  |
| 13         | 5.178    | 239            | 0.2952 | HOMO-3 $\rightarrow$ LUMO+3 | 0.1445  |
|            |          |                |        | HOMO-1 $\rightarrow$ LUMO+5 | 0.6567  |
|            |          |                |        | HOMO $\rightarrow$ LUMO+2   | -0.1583 |

<sup>a</sup> Oscillator strength. <sup>b</sup> Coefficient of the wave function for each excitation.

In comparison with the major excited states 4–13 having large oscillator strength, the excited states 1–3 show very smaller oscillator strength (Table S5).

**Table S6** Calculated excitation energy ( $E$ ,  $\lambda$ ) and oscillator strength ( $f$ ) of **1**·quinuclidine by DFT and TD-DFT at the B3LYP/6-311G(d,p) level (in cyclohexane, PCM model).

| Transition | $E$ / eV | $\lambda$ / nm | $f^a$  | Main CI coefficient $b$     |         |
|------------|----------|----------------|--------|-----------------------------|---------|
| 1          | 4.585    | 270            | 0.0581 | HOMO $\rightarrow$ LUMO     | 0.5790  |
|            |          |                |        | HOMO-1 $\rightarrow$ LUMO   | 0.5789  |
| 2          | 4.822    | 257            | 0.0036 | HOMO-1 $\rightarrow$ LUMO+2 | 0.4553  |
|            |          |                |        | HOMO $\rightarrow$ LUMO     | -0.3020 |
|            |          |                |        | HOMO $\rightarrow$ LUMO+1   | 0.3826  |
|            |          |                |        | HOMO-1 $\rightarrow$ LUMO   | -0.3029 |
|            |          |                |        | HOMO-1 $\rightarrow$ LUMO+1 | -0.4170 |
|            |          |                |        | HOMO $\rightarrow$ LUMO+2   | 0.4235  |
| 3          | 5.081    | 244            | 0.0172 | HOMO-1 $\rightarrow$ LUMO+1 | 0.4681  |
|            |          |                |        | HOMO $\rightarrow$ LUMO+2   | 0.4677  |
| 4          | 5.151    | 241            | 0.2503 | HOMO-1 $\rightarrow$ LUMO   | 0.1449  |
|            |          |                |        | HOMO $\rightarrow$ LUMO+3   | 0.6600  |
|            |          |                |        | HOMO-1 $\rightarrow$ LUMO+3 | 0.6600  |
|            |          |                |        | HOMO $\rightarrow$ LUMO     | -0.1449 |

<sup>a</sup>Oscillator strength. <sup>b</sup> Coefficient of the wave function for each excitation.

**Table S7** Calculated excitation energy ( $E$ ,  $\lambda$ ) and oscillator strength ( $f$ ) of  $\mathbf{1}_2\cdot\text{DABCO}$  by DFT and TD-DFT at the B3LYP/6-311G(d,p) level (in cyclohexane, PCM model).

| Transition | $E$ / eV | $\lambda$ / nm | $f^a$  | Main CI coefficient $b$     |         |
|------------|----------|----------------|--------|-----------------------------|---------|
| 1          | 4.534    | 274            | 0.0044 | HOMO $\rightarrow$ LUMO     | 0.4752  |
|            |          |                |        | HOMO-1 $\rightarrow$ LUMO   | 0.4454  |
| 2          | 4.537    | 273            | 0.1061 | HOMO-2 $\rightarrow$ LUMO   | 0.4457  |
|            |          |                |        | HOMO-3 $\rightarrow$ LUMO   | 0.4760  |
| 3          | 4.795    | 259            | 0.0008 | HOMO-1 $\rightarrow$ LUMO   | 0.2759  |
|            |          |                |        | HOMO $\rightarrow$ LUMO     | 0.2776  |
| 4          | 4.797    | 258            | 0.0129 | HOMO-2 $\rightarrow$ LUMO+3 | 0.2509  |
|            |          |                |        | HOMO-2 $\rightarrow$ LUMO+2 | 0.2749  |
| 5          | 4.938    | 251            | 0.0020 | HOMO-2 $\rightarrow$ LUMO+1 | 0.5841  |
|            |          |                |        | HOMO-3 $\rightarrow$ LUMO+1 | 0.5838  |
| 6          | 5.067    | 245            | 0.0430 | HOMO-3 $\rightarrow$ LUMO+2 | 0.2778  |
|            |          |                |        | HOMO-2 $\rightarrow$ LUMO+3 | 0.2395  |
|            |          |                |        | HOMO-1 $\rightarrow$ LUMO+3 | 0.2594  |
| 7          | 5.147    | 241            | 0.0008 | HOMO $\rightarrow$ LUMO+6   | 0.3915  |
|            |          |                |        | HOMO-3 $\rightarrow$ LUMO+7 | 0.3423  |
|            |          |                |        | HOMO-1 $\rightarrow$ LUMO+6 | 0.3472  |
| 8          | 5.1545   | 240            | 0.4310 | HOMO-2 $\rightarrow$ LUMO+6 | 0.3171  |
|            |          |                |        | HOMO $\rightarrow$ LUMO+7   | 0.3259  |
|            |          |                |        | HOMO-3 $\rightarrow$ LUMO+6 | 0.3638  |
|            |          |                |        | HOMO-2 $\rightarrow$ LUMO+7 | -0.3004 |
|            |          |                |        | HOMO-1 $\rightarrow$ LUMO+7 | 0.3021  |

<sup>a</sup> Oscillator strength. <sup>b</sup> Coefficient of the wave function for each excitation.

**Table S8** Calculated excitation energy ( $E$ ,  $\lambda$ ) and oscillator strength ( $f$ ) of **1**-DABCO by DFT and TD-DFT at the B3LYP/6-311G(d,p) level (in cyclohexane, PCM model).

| Transition | $E$ / eV | $\lambda$ / nm | $f^a$  | Main CI coefficient $b$     |         |
|------------|----------|----------------|--------|-----------------------------|---------|
| 1          | 4.577    | 271            | 0.0591 | HOMO $\rightarrow$ LUMO     | 0.5909  |
|            |          |                |        | HOMO-1 $\rightarrow$ LUMO   | 0.5906  |
| 2          | 4.818    | 257            | 0.0038 | HOMO-1 $\rightarrow$ LUMO+1 | 0.4183  |
|            |          |                |        | HOMO $\rightarrow$ LUMO     | -0.2441 |
|            |          |                |        | HOMO $\rightarrow$ LUMO+2   | 0.4149  |
|            |          |                |        | HOMO-1 $\rightarrow$ LUMO   | 0.2424  |
|            |          |                |        | HOMO-1 $\rightarrow$ LUMO+2 | 0.4666  |
|            |          |                |        | HOMO $\rightarrow$ LUMO+1   | -0.3620 |
| 3          | 5.078    | 244            | 0.0170 | HOMO-1 $\rightarrow$ LUMO+1 | 0.4580  |
|            |          |                |        | HOMO-1 $\rightarrow$ LUMO+2 | -0.1519 |
|            |          |                |        | HOMO $\rightarrow$ LUMO+1   | -0.1513 |
|            |          |                |        | HOMO $\rightarrow$ LUMO+2   | -0.4573 |
| 4          | 5.153    | 240            | 0.2488 | HOMO-1 $\rightarrow$ LUMO   | 0.1405  |
|            |          |                |        | HOMO $\rightarrow$ LUMO+3   | 0.6579  |
|            |          |                |        | HOMO-1 $\rightarrow$ LUMO+1 | 0.6578  |
|            |          |                |        | HOMO $\rightarrow$ LUMO     | -0.1404 |

<sup>a</sup>Oscillator strength. <sup>b</sup> Coefficient of the wave function for each excitation.



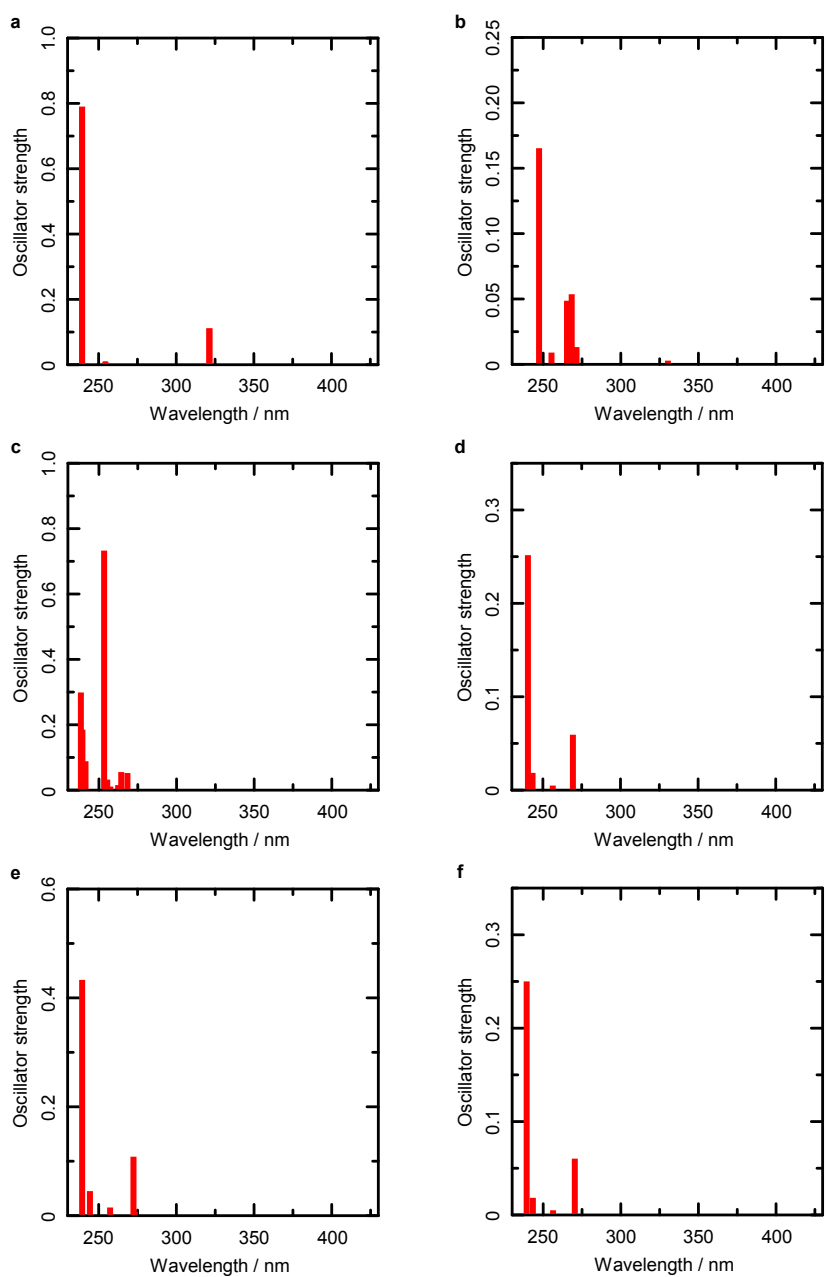

**Figure S9** Electronic transition (oscillator strength versus wavelength) obtained by TD-DFT calculation (B3LYP/6-311G(d,p), in cyclohexane (PCM model)) for (a) **1**, (b) **1**·pyridine, (c) **1**·DMAP, (d) **1**·quinuclidine, (e) **1**<sub>2</sub>·DABCO, and (f) **1**·DABCO, respectively. The values of the oscillator strength are shown in Tables 2, 4–8.

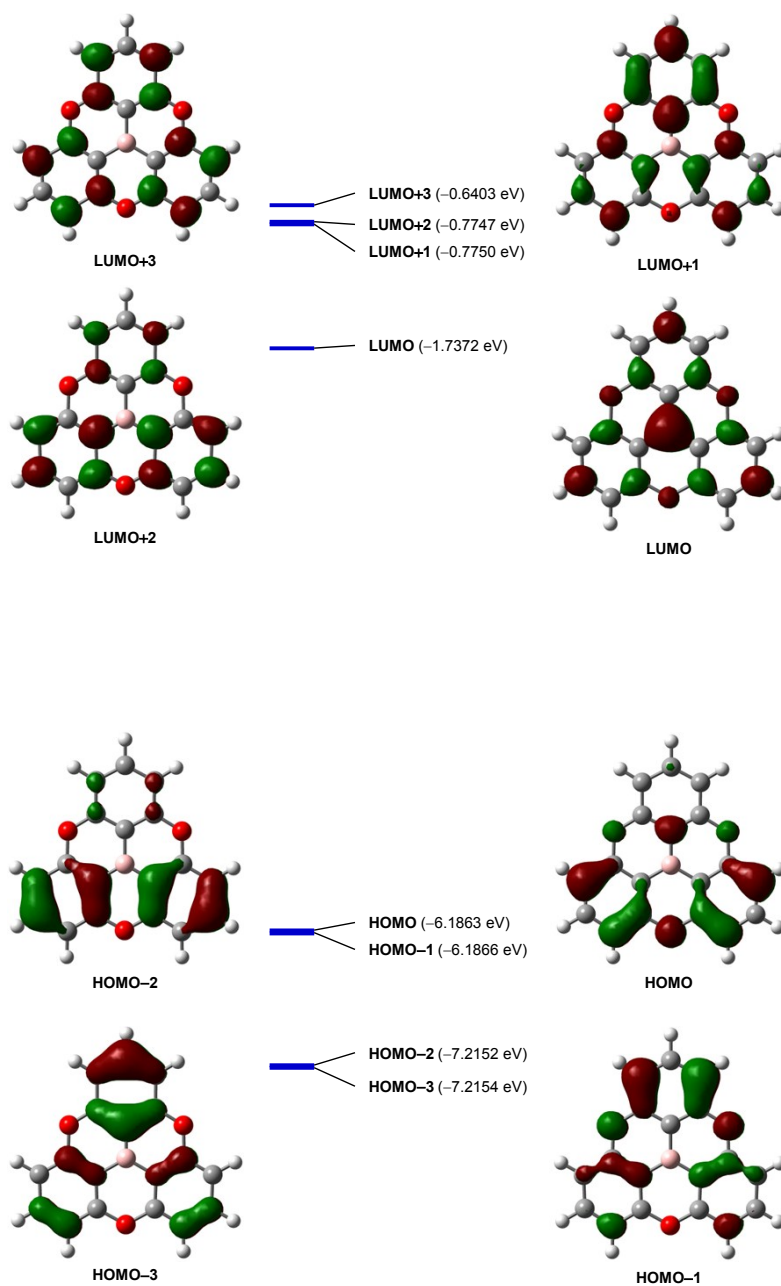

**Figure S10** HOMO and LUMO levels for **1** calculated at the B3LYP/6-311G(d,p) level (in cyclohexane, PCM model).

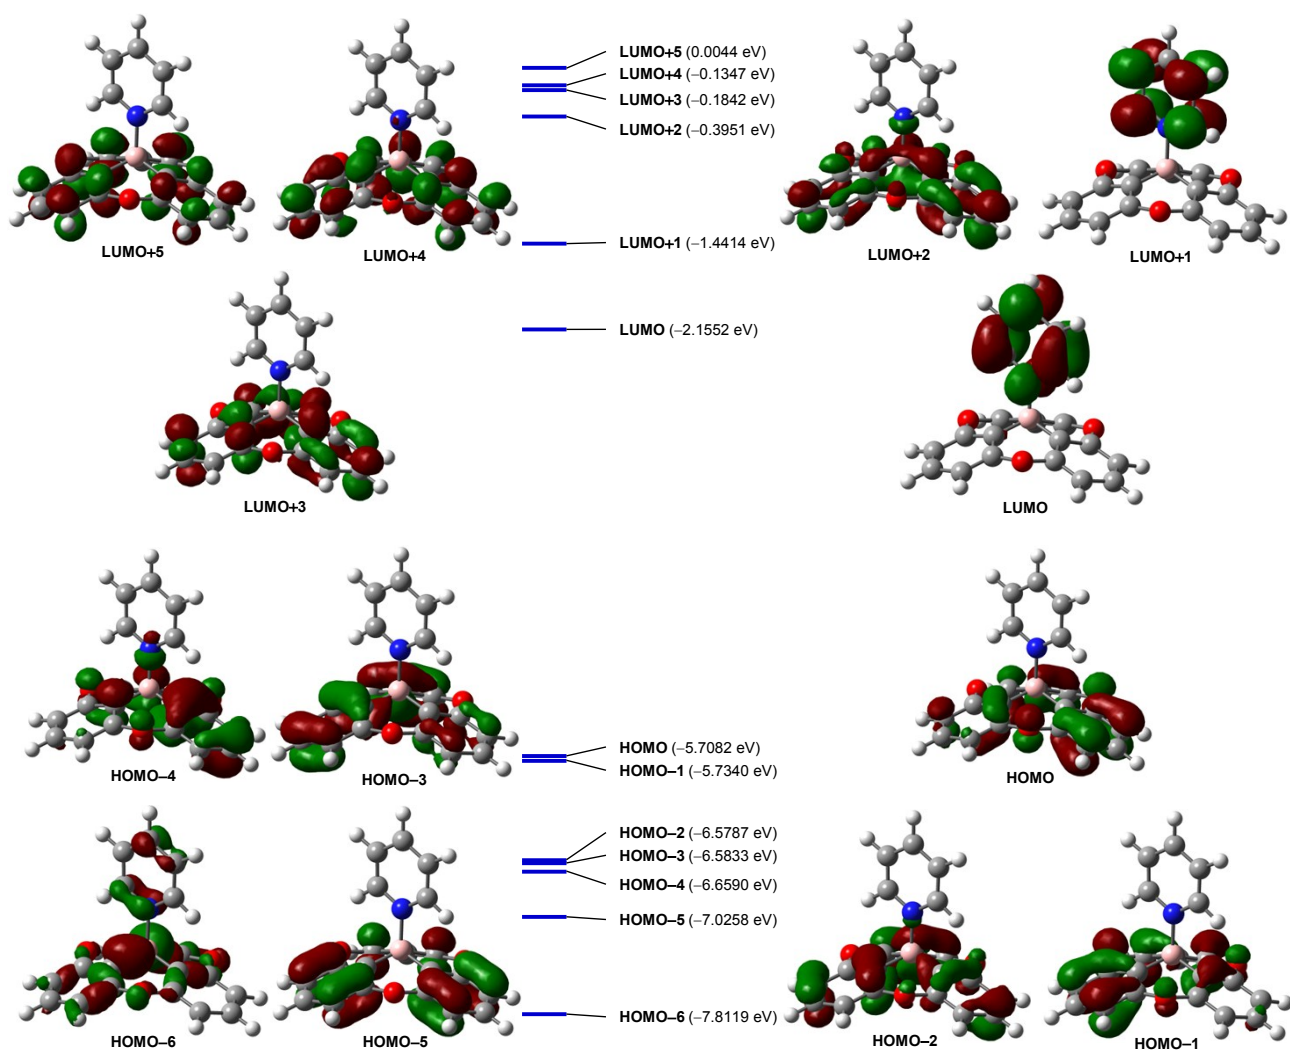

**Figure S11** HOMO and LUMO levels for **1**-pyridine calculated at the B3LYP/6-311G(d,p) level (in cyclohexane, PCM model).

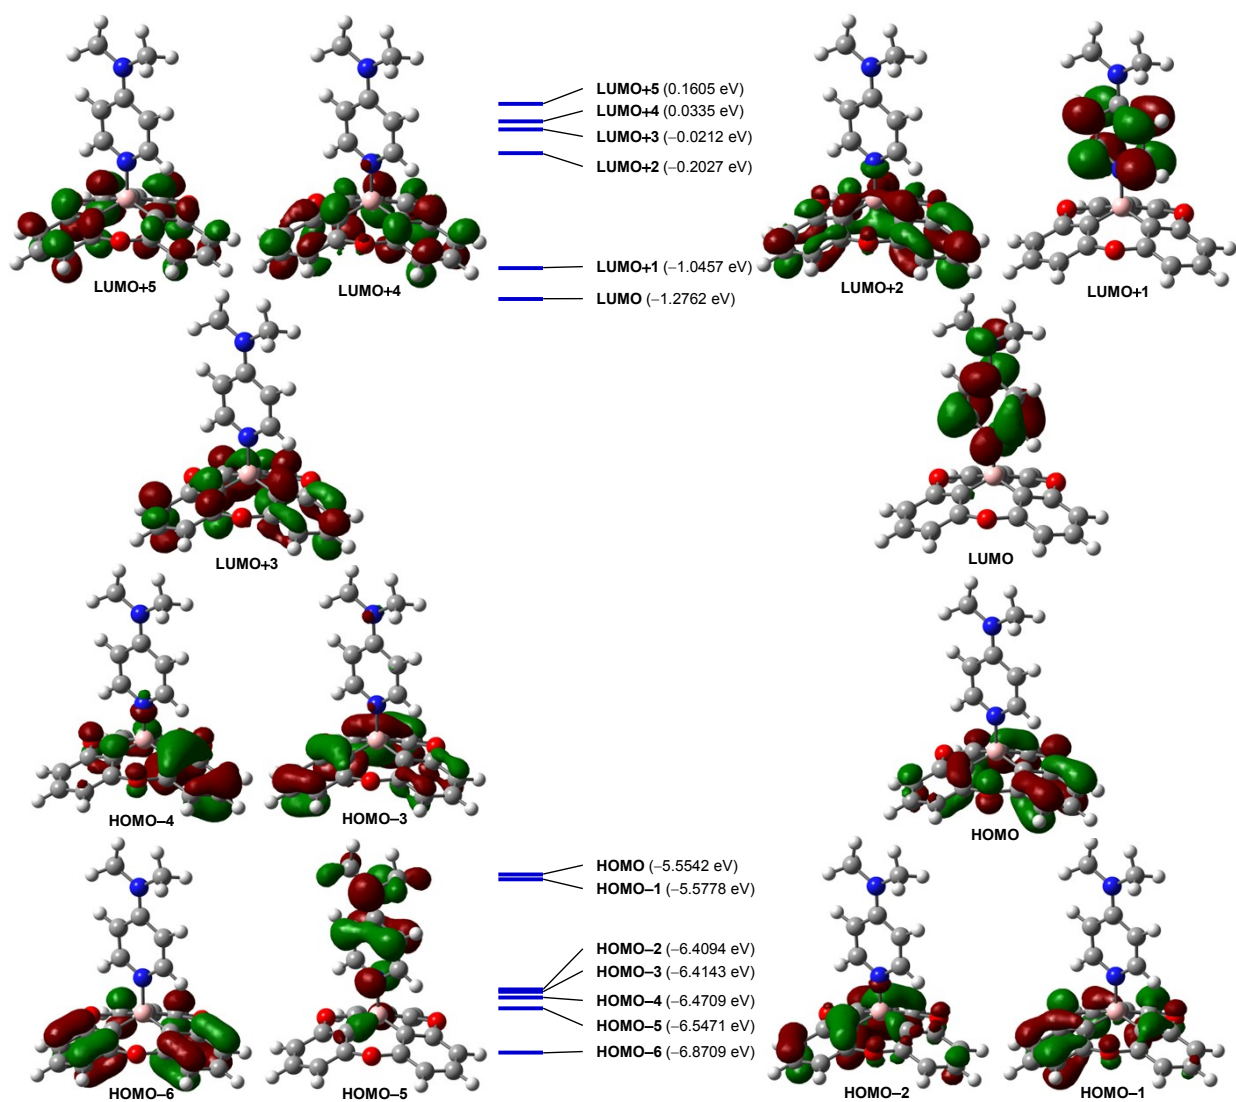

**Figure S12** HOMO and LUMO levels for 1·DMAP calculated at the B3LYP/6-311G(d,p) level (in cyclohexane, PCM model).

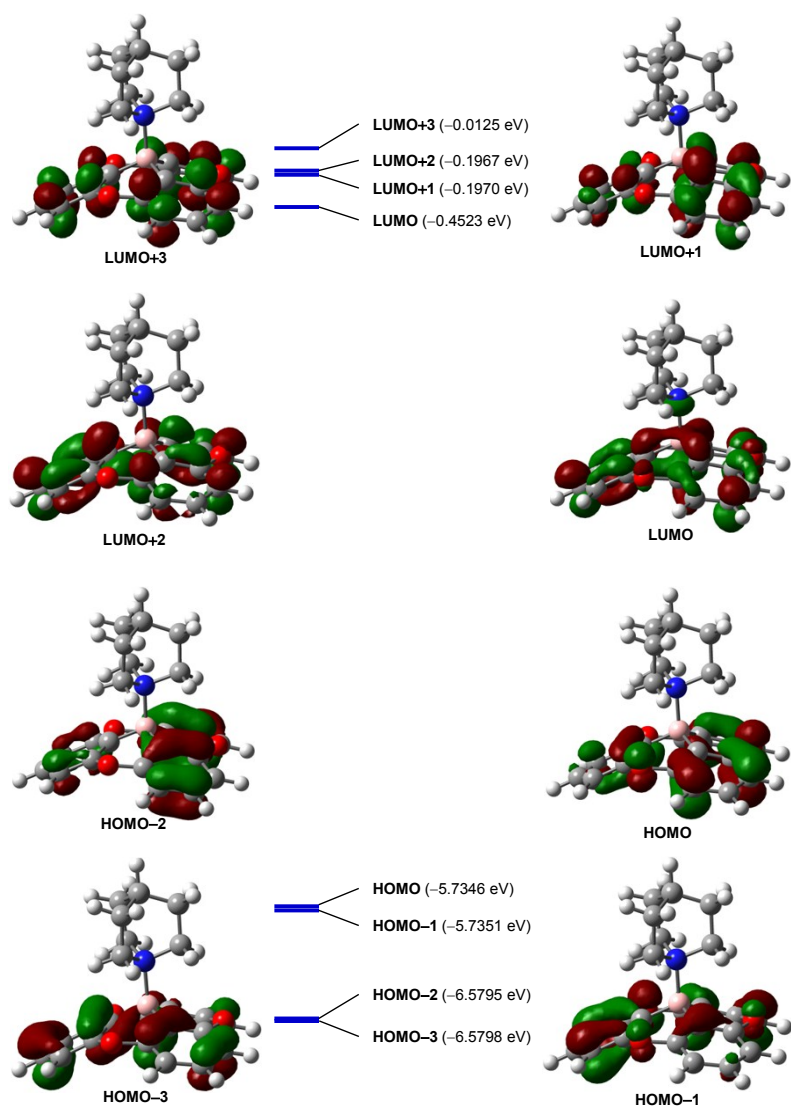

**Figure S13** HOMO and LUMO levels for 1-quinuclidine calculated at the B3LYP/6-311G(d,p) level (in cyclohexane, PCM model).

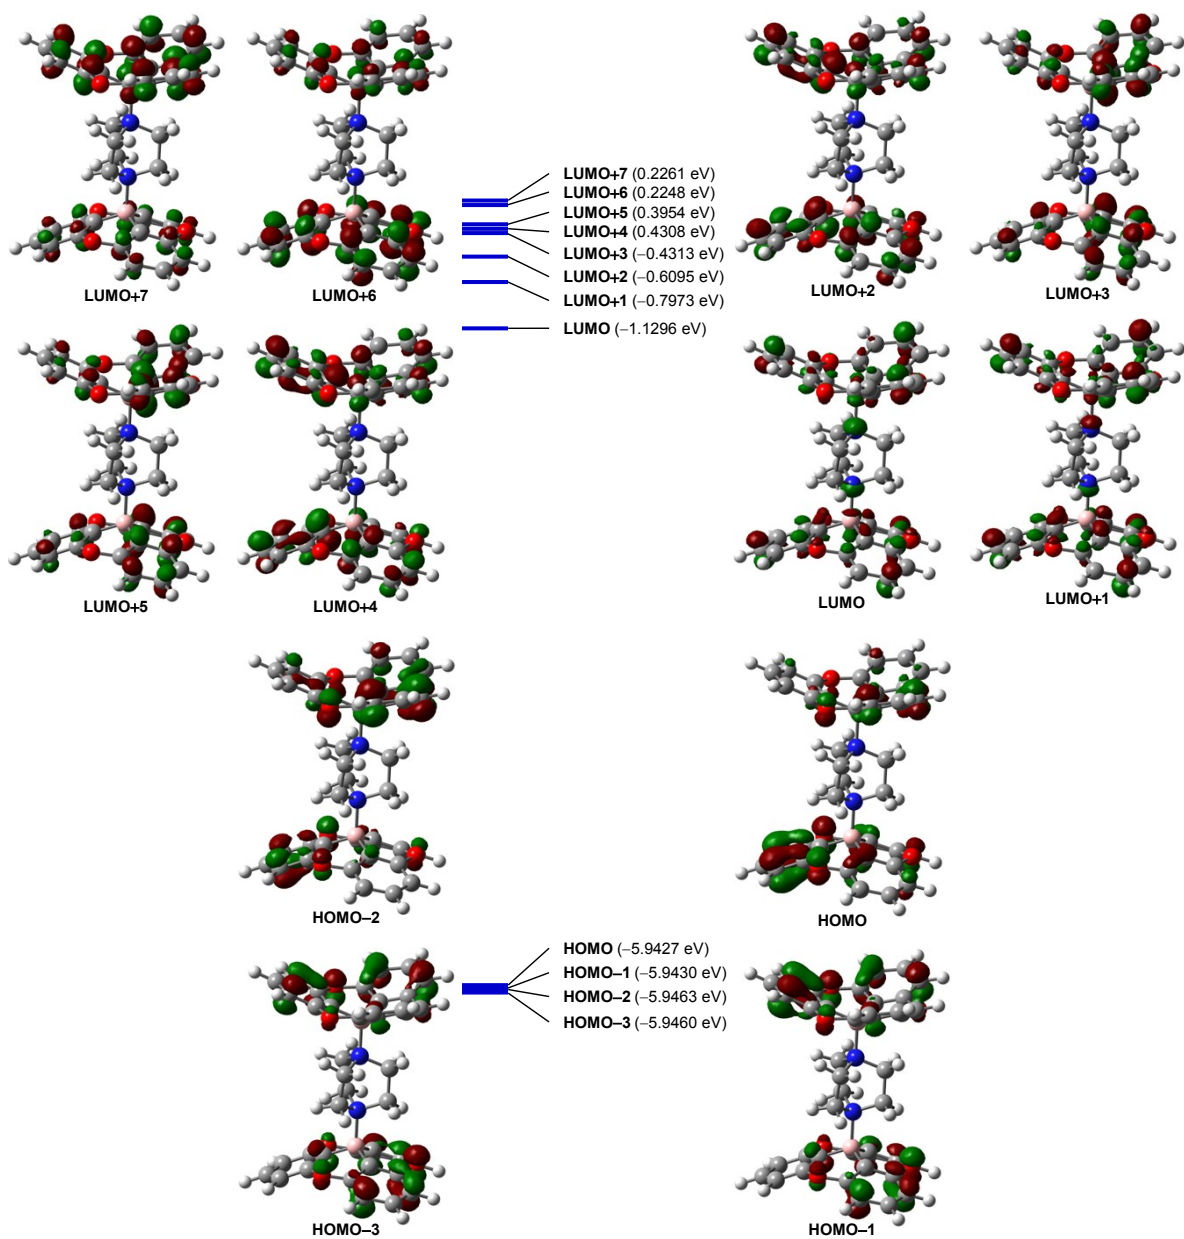

**Figure S14** HOMO and LUMO levels for  $1_2 \cdot \text{DABCO}$  calculated at the B3LYP/6-311G(d,p) level (in cyclohexane, PCM model).



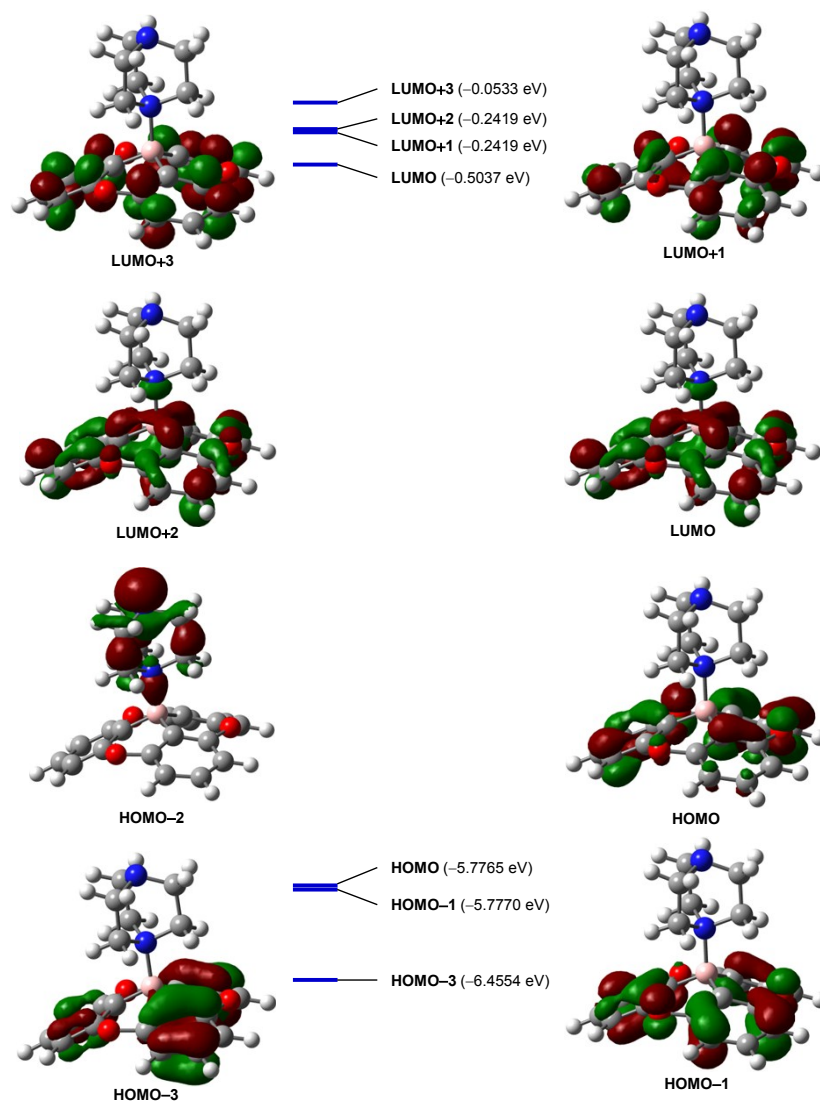

**Figure S15** HOMO and LUMO levels for 1-DABCO calculated at the B3LYP/6-311G(d,p) level (in cyclohexane, PCM model).

**Table S9** The energy and coordinates of **1** at the ground state calculated at the B3LYP/6-311G(d,p) level (in cyclohexane, PCM model).

Energy = -942.1134963 Hartrees

|   | X            | Y            | Z            |   | X           | Y                        | Z             |
|---|--------------|--------------|--------------|---|-------------|--------------------------|---------------|
| C | -0.000394206 | -2.832618002 | 2.422636301  | O | 0.000260361 | 1.396514839              | -2.418910264  |
| H | -0.00073169  | -3.914729624 | 2.445754934  | B | 0.000973709 | 3.92765×10 <sup>-5</sup> | 0             |
| C | -0.000389352 | -0.681760402 | 3.664307267  | O | 0.000253306 | -2.793170858             | -0.0000000001 |
| H | -0.000725672 | -0.160691229 | 4.612990297  | C | 0.000203499 | 2.122118591              | 1.230557675   |
| C | 0.000650606  | -0.733424866 | 1.270161925  | C | 0.000205188 | 0.004655919              | 2.452929001   |
| C | 0.000199337  | -2.126768154 | 1.222473671  | O | 0.000260361 | 1.396514839              | 2.418910265   |
| C | 0.000643015  | 1.466749938  | 0.0000000001 |   |             |                          |               |
| C | 0.000650606  | -0.733424866 | -1.270161925 |   |             |                          |               |
| C | 0.000203499  | 2.122118591  | -1.230557675 |   |             |                          |               |
| C | 0.000205188  | 0.004655919  | -2.452929001 |   |             |                          |               |
| C | 0.000199337  | -2.126768154 | -1.222473671 |   |             |                          |               |
| C | -0.000388182 | 3.514393183  | 1.241765908  |   |             |                          |               |
| C | -0.000388182 | 3.514393184  | -1.241765908 |   |             |                          |               |
| C | -0.000389352 | -0.681760402 | -3.664307267 |   |             |                          |               |
| C | -0.000394206 | -2.832618002 | -2.422636301 |   |             |                          |               |
| C | -0.000626394 | 4.16883806   | 0.0000000002 |   |             |                          |               |
| H | -0.000721677 | 4.075506522  | 2.167331762  |   |             |                          |               |
| H | -0.000721677 | 4.075506522  | -2.167331762 |   |             |                          |               |
| C | -0.000628985 | -2.084352677 | -3.610255683 |   |             |                          |               |
| H | -0.000725672 | -0.160691229 | -4.612990297 |   |             |                          |               |
| H | -0.00073169  | -3.914729623 | -2.445754935 |   |             |                          |               |
| H | -0.001101881 | 5.253112687  | 0.0000000002 |   |             |                          |               |
| H | -0.001110136 | -2.626442977 | -4.549294637 |   |             |                          |               |
| C | -0.000628985 | -2.084352678 | 3.610255683  |   |             |                          |               |
| H | -0.001110136 | -2.626442978 | 4.549294637  |   |             |                          |               |



**Table S10** The energy and coordinates of 1-pyridine at the ground state calculated at the B3LYP/6-311G(d,p) level (in cyclohexane, PCM model).

Energy = -1190.474483 Hartrees

|   | X            | Y            | Z            |   | X            | Y            | Z            |
|---|--------------|--------------|--------------|---|--------------|--------------|--------------|
| C | -2.568547871 | 2.321184476  | -1.554285133 | O | 1.469447115  | -2.40817895  | -0.464440999 |
| H | -3.587080507 | 2.268677599  | -1.918759409 | B | 0.00299714   | -0.000445096 | 0.141048269  |
| C | -0.465308344 | 3.543195715  | -1.299548838 | O | -2.677440923 | 0.003283825  | -0.930894509 |
| H | 0.132407553  | 4.430465924  | -1.468467292 | C | 2.167793895  | 1.20330845   | -0.50379457  |
| C | -0.6622806   | 1.267730464  | -0.487978239 | C | 0.104241463  | 2.404099956  | -0.734117079 |
| C | -1.962077775 | 1.204585323  | -0.983184628 | O | 1.471169758  | 2.409342034  | -0.452004394 |
| C | 1.51502934   | 5.4444E-06   | -0.241465932 | C | -1.466839397 | -0.005551363 | 2.295522497  |
| C | -0.663187468 | -1.264874486 | -0.494512473 | C | -1.717809083 | -0.008918887 | 3.656527139  |
| C | 2.166934541  | -1.20239399  | -0.510003864 | C | -0.643228146 | -0.01142842  | 4.542913374  |
| C | 0.102529688  | -2.400497659 | -0.746541157 | C | 0.648068924  | -0.010469684 | 4.028634532  |
| C | -1.962932421 | -1.198239205 | -0.98939972  | C | 0.825847011  | -0.007050841 | 2.65260894   |
| C | 3.51820193   | 1.224292689  | -0.848344942 | N | -0.21323229  | -0.004627875 | 1.80159275   |
| C | 3.517327411  | -1.222566807 | -0.854656529 | H | -0.811444917 | -0.014088257 | 5.613082119  |
| C | -0.467819085 | -3.536238615 | -1.317883368 | H | -2.267125255 | -0.003503434 | 1.568098484  |
| C | -2.570183521 | -2.3114262   | -1.566301846 | H | -2.740788889 | -0.009543867 | 4.008792124  |
| C | 4.180154869  | 0.000984026  | -0.990101906 | H | 1.51478813   | -0.012332808 | 4.67633674   |
| H | 4.024598531  | 2.164101726  | -1.030763692 | H | 1.806854023  | -0.006168743 | 2.197685008  |
| H | 4.02305462   | -2.161783476 | -1.041918894 |   |              |              |              |
| C | -1.813026027 | -3.47975161  | -1.693767067 |   |              |              |              |
| H | 0.12926991   | -4.423044287 | -1.491395121 |   |              |              |              |
| H | -3.588670634 | -2.256302413 | -1.930516256 |   |              |              |              |
| H | 5.229276252  | 0.001315981  | -1.264089258 |   |              |              |              |
| H | -2.269004849 | -4.354068579 | -2.144662494 |   |              |              |              |
| C | -1.810561107 | 3.489617388  | -1.675696697 |   |              |              |              |
| H | -2.265924117 | 4.366587125  | -2.122039899 |   |              |              |              |

**Table S11** The energy and coordinates of **1**-DMAP at the ground state calculated at the B3LYP/6-311G(d,p) level (in cyclohexane, PCM model).

Energy = -1324.490195 Hartrees

|   | X           | Y            | Z            |   | X            | Y            | Z                         |
|---|-------------|--------------|--------------|---|--------------|--------------|---------------------------|
| C | 2.168448491 | 3.308929606  | -1.222958833 | O | 1.231079023  | -2.812296786 | 0.00022486                |
| H | 2.43495812  | 3.776414138  | -2.16295405  | B | 0.592457468  | 0.007648006  | 3.12101E-05               |
| C | 2.168375962 | 3.309080354  | 1.222706704  | O | 1.439730429  | 1.356433592  | -2.408739609              |
| H | 2.434829973 | 3.77668107   | 2.162659907  | C | 1.496886523  | -0.038371947 | 2.400962326               |
| C | 1.232045252 | 1.434741823  | -3.80195E-05 | C | 1.603239039  | 2.034806508  | 1.201743894               |
| C | 1.603310505 | 2.034658258  | -1.201872033 | O | 1.439586024  | 1.356731849  | 2.408685685               |
| C | 1.124154474 | -0.752309853 | 1.265178741  | C | -1.743391587 | 1.231134488  | -0.000110825              |
| C | 1.124231354 | -0.752466228 | -1.264989989 | C | -3.117655095 | 1.294525894  | -0.000157508              |
| C | 1.403093295 | -2.114648233 | 1.200948384  | C | -3.885814664 | 0.103422006  | -0.000109262              |
| C | 1.403166565 | -2.11479666  | -1.200574341 | C | -3.143808567 | -1.107022461 | -2.40303×10 <sup>-5</sup> |
| C | 1.497031627 | -0.038669133 | -2.40083962  | C | -1.771392688 | -1.075037405 | 1.62982E-05               |
| C | 1.968938234 | -0.692198079 | 3.537617421  | N | -1.056422192 | 0.071953645  | -2.37441E-05              |
| C | 1.874436188 | -2.807036083 | 2.314661337  | H | -1.143941012 | 2.131368367  | -0.000145216              |
| C | 1.874575729 | -2.807322597 | -2.314173337 | H | -3.584189151 | 2.268055414  | -0.000232956              |
| C | 1.969151018 | -0.692636133 | -3.537385552 | H | -3.633158763 | -2.069290527 | 8.1694E-06                |
| C | 2.122813137 | -2.080579379 | 3.482902088  | H | -1.197869974 | -1.992294092 | 8.16743E-05               |
| H | 2.236643848 | -0.129744797 | 4.423802348  | C | -5.964510335 | 1.386635261  | -0.000292865              |
| H | 2.069002099 | -3.871180558 | 2.259591984  | H | -5.729681036 | 1.981172785  | 0.888442156               |
| C | 2.12302253  | -2.081010745 | -3.48248919  | H | -5.729702801 | 1.980961364  | -0.889177142              |
| H | 2.069138201 | -3.871460253 | -2.258960265 | H | -7.033120971 | 1.185789473  | -0.000252472              |
| H | 2.236909593 | -0.130293005 | -4.423624312 | C | -5.993005185 | -1.13544338  | -0.000135081              |
| H | 2.493990811 | -2.602937013 | 4.357702029  | H | -5.772271789 | -1.735011978 | -0.889034469              |
| H | 2.494252554 | -2.603476819 | -4.357202156 | H | -5.772232938 | -1.735012198 | 0.888752314               |
| C | 2.414858438 | 3.940036037  | -0.000157654 | H | -7.05673745  | -0.91011427  | -0.000107417              |
| H | 2.858630605 | 4.929512977  | -0.000205405 | N | -5.241839602 | 0.117391946  | -0.000142616              |

**Table S12** The energy and coordinates of 1·quinuclidine at the ground state calculated at the B3LYP/6-311G(d,p) level (in cyclohexane, PCM model).

Energy = -1271.524339 Hartrees

|   | X            | Y            | Z            |   | X            | Y            | Z            |
|---|--------------|--------------|--------------|---|--------------|--------------|--------------|
| C | -1.565374432 | 2.689233695  | -2.3731759   | O | -0.935838182 | -1.334337236 | 2.434122984  |
| H | -1.819574153 | 3.741395483  | -2.336800626 | B | -0.122185255 | 0.000896293  | -0.001021684 |
| C | -1.561529854 | 0.546819735  | -3.546303022 | O | -0.923954554 | 2.780714387  | -0.067146113 |
| H | -1.812497997 | -0.051493688 | -4.413487056 | C | -1.04795797  | -2.100679671 | -1.15712756  |
| C | -0.686348424 | 0.702884015  | -1.285154548 | C | -1.04337379  | -0.053909793 | -2.400599174 |
| C | -1.047237002 | 2.049560994  | -1.248994851 | O | -0.914607844 | -1.443226748 | -2.380348937 |
| C | -0.692768892 | -1.459768506 | 0.029555002  | C | 2.126887942  | -0.79951216  | -1.153481415 |
| C | -0.697567298 | 0.759966796  | 1.245058618  | C | 2.124403648  | 1.405581729  | -0.101514747 |
| C | -1.059567272 | -2.046176041 | 1.240337892  | C | 2.115792778  | -0.608829388 | 1.28212108   |
| C | -1.063119019 | 0.054256971  | 2.391041023  | C | 3.668493444  | -0.691019896 | -1.247150256 |
| C | -1.058109709 | 2.103252309  | 1.145448911  | H | 1.640032797  | -0.428174745 | -2.052955353 |
| C | -1.570260496 | -3.392439246 | -1.152355363 | H | 1.801947644  | -1.827277677 | -0.997889488 |
| C | -1.582283056 | -3.337070593 | 1.289618548  | C | 3.664624755  | 1.43644963   | 0.052554325  |
| C | -1.589684433 | 0.706308653  | 3.504095695  | H | 1.629764821  | 1.998683059  | 0.664985675  |
| C | -1.584780737 | 2.793494141  | 2.235493752  | H | 1.806377816  | 1.783190755  | -1.072246891 |
| C | -1.800742363 | -4.005545046 | 0.082207212  | H | 1.788889396  | 0.040713775  | 2.092891859  |
| H | -1.819933407 | -3.886263182 | -2.083374068 | H | 1.623221793  | -1.571035232 | 1.406608606  |
| H | -1.840928721 | -3.788067331 | 2.239720206  | C | 3.656932892  | -0.752377145 | 1.244869055  |
| C | -1.813959674 | 2.082970439  | 3.416636428  | C | 4.200316535  | -0.002807977 | 0.019005472  |
| H | -1.847380729 | 0.147792009  | 4.3955175    | H | 3.958339666  | -0.119061455 | -2.132893874 |
| H | -1.838497251 | 3.84286667   | 2.149401834  | H | 4.104264655  | -1.687693093 | -1.351949336 |
| H | -2.21193334  | -5.008613932 | 0.102946733  | H | 3.944727587  | 1.917191992  | 0.993873751  |
| H | -2.228637485 | 2.604039347  | 4.272304526  | H | 4.105863083  | 2.02767052   | -0.753633747 |
| C | -1.785848175 | 1.925753746  | -3.522822897 | H | 4.089061007  | -0.347215602 | 2.16316264   |
| H | -2.193834156 | 2.407614461  | -4.404296016 | H | 3.941392726  | -1.806953108 | 1.193642965  |
| N | 1.590623592  | -0.000218129 | 0.006780167  | H | 5.2924194    | -0.003901234 | 0.024130454  |

**Table S13** The energy and coordinates of  $\mathbf{1}_2 \cdot \text{DABCO}$  at the ground state optimized at the B3LYP/6-311G(d,p) level (in cyclohexane, PCM model).

Energy = -2229.6678996 Hartrees

|   | X            | Y            | Z            |   | X            | Y            | Z            |
|---|--------------|--------------|--------------|---|--------------|--------------|--------------|
| C | -4.472312051 | 3.329753092  | 1.32780831   | B | -3.053493262 | -0.002104662 | 0.001871159  |
| H | -4.721902088 | 3.77683186   | 2.282073025  | O | -3.824937161 | 1.314354913  | 2.45256267   |
| C | -4.478908291 | 3.403315842  | -1.11586325  | C | -3.960516738 | 0.069846453  | -2.39500949  |
| H | -4.733398891 | 3.906224175  | -2.040532819 | C | -3.962341554 | 2.109463347  | -1.133920302 |
| C | -3.603946389 | 1.459558166  | 0.046754343  | O | -3.834485323 | 1.459149774  | -2.36244707  |
| C | -3.956395728 | 2.037265435  | 1.266366991  | C | -0.779130556 | 0.641409641  | -1.242922845 |
| C | -3.603479557 | -0.696056437 | -1.285374254 | C | -0.777148838 | 0.754027326  | 1.175654404  |
| C | -3.598759003 | -0.772045473 | 1.247381656  | C | -0.776435821 | -1.396573119 | 0.063620527  |
| C | -3.955995294 | -2.045018318 | -1.257565764 | C | 0.747391098  | 0.836659508  | -1.123438989 |
| C | -3.950775647 | -2.117368503 | 1.139504463  | H | -1.283931359 | 1.595052188  | -1.381304608 |
| C | -3.952630157 | -0.07465325  | 2.401992419  | H | -1.040101629 | -0.005184777 | -2.079250084 |
| C | -4.475399798 | -0.525343706 | -3.544321757 | C | 0.749436453  | 0.553655477  | 1.281187576  |
| C | -4.471348    | -2.678439584 | -2.386440524 | H | -1.279426036 | 0.395093106  | 2.071563508  |
| C | -4.461929833 | -2.816995835 | 2.230174511  | H | -1.039986764 | 1.80129708   | 1.035646753  |
| C | -4.463993896 | -0.737482528 | 3.515736302  | H | -1.036826828 | -1.798190054 | 1.041644303  |
| C | -4.694379096 | -1.90587138  | -3.529445048 | H | -1.279715859 | -1.993942696 | -0.693783515 |
| H | -4.728727567 | 0.076653656  | -4.408146126 | C | 0.749926985  | -1.387200464 | -0.165627481 |
| H | -4.721341482 | -3.731737205 | -2.359194542 | H | 1.008797047  | 1.871911331  | -0.909737015 |
| C | -4.682150637 | -2.114463463 | 3.418463784  | H | 1.249379285  | 0.543373314  | -2.042999564 |
| H | -4.711269572 | -3.867078884 | 2.141234856  | H | 1.011449818  | -0.150151867 | 2.069552645  |
| H | -4.714618165 | -0.18814151  | 4.414719329  | H | 1.25253373   | 1.49612188   | 1.486364096  |
| H | -5.100719705 | -2.382484875 | -4.414390011 | H | 1.253946392  | -2.035966917 | 0.547515346  |
| H | -5.084842267 | -2.644159078 | 4.2744186    | H | 1.010058969  | -1.718460108 | -1.169713679 |
| C | -4.697123519 | 4.006686949  | 0.125642291  | N | -1.321880201 | -0.000582462 | -0.000669827 |
| H | -5.104040265 | 5.011104331  | 0.156952221  | N | 1.293242494  | 0.00163739   | -0.003005618 |
| O | -3.823894624 | -2.783182396 | -0.08027097  | C | 3.572348259  | 1.465765414  | 0.055365969  |

(Table S13 Continued)

---

|   | X           | Y            | Z            |   | X           | Y            | Z            |
|---|-------------|--------------|--------------|---|-------------|--------------|--------------|
| C | 3.926394335 | 2.128528536  | -1.119798934 | C | 4.439857858 | -0.764465827 | 3.500680786  |
| C | 3.925761081 | 2.031875391  | 1.279850265  | C | 4.444185489 | -2.830803735 | 2.193874184  |
| C | 4.4399617   | 3.423058468  | -1.089030597 | C | 4.662737664 | -2.139918096 | 3.388906089  |
| C | 4.439050478 | 3.325037125  | 1.353904381  | H | 4.689194141 | -0.224084436 | 4.405441341  |
| C | 4.659693475 | 4.014314172  | 0.158363013  | H | 4.696750268 | -3.879098886 | 2.093756482  |
| H | 4.691281042 | 3.936304327  | -2.008897941 | H | 5.067738278 | -2.676932512 | 4.239197981  |
| H | 4.689666602 | 3.762845944  | 2.312188005  | O | 3.799172494 | 1.490238154  | -2.354212644 |
| H | 5.064501176 | 5.019255397  | 0.198851404  | O | 3.800802578 | -2.774821686 | -0.115231445 |
| C | 3.573912219 | -0.676134406 | -1.29897025  | O | 3.79622183  | 1.296620223  | 2.458979608  |
| C | 3.927594917 | -2.025297087 | -1.285360157 | B | 3.025113259 | 0.003471529  | -0.003628667 |
| C | 3.928595278 | 0.101269622  | -2.401059613 |   |             |              |              |
| C | 4.441258827 | -2.64604627  | -2.421607607 |   |             |              |              |
| C | 4.442297055 | -0.481253647 | -3.557741414 |   |             |              |              |
| C | 4.662206438 | -1.861393683 | -3.557182268 |   |             |              |              |
| H | 4.692309599 | -3.69934062  | -2.405830844 |   |             |              |              |
| H | 4.693714455 | 0.129870395  | -4.415692694 |   |             |              |              |
| H | 5.067542814 | -2.328722451 | -4.447522354 |   |             |              |              |
| C | 3.574127547 | -0.778012316 | 1.232818254  |   |             |              |              |
| C | 3.926408305 | -0.091161816 | 2.394558255  |   |             |              |              |
| C | 3.929612285 | -2.120985877 | 1.111023207  |   |             |              |              |

---

**Table S14** The energy and coordinates of 1-DABCO at the ground state calculated at the B3LYP/6-311G(d,p) level (in cyclohexane, PCM model).

Energy = -1287.54614 Hartrees

|   | X            | Y            | Z            |   | X            | Y            | Z            |
|---|--------------|--------------|--------------|---|--------------|--------------|--------------|
| C | -1.577489767 | 3.436313734  | 1.002607866  | B | -0.12776184  | -0.000246517 | 0.000131633  |
| H | -1.832117272 | 3.968669958  | 1.910770034  | O | -0.928205115 | 1.539433174  | 2.313723386  |
| C | -1.576861115 | 3.27995488   | -1.435708743 | C | -1.047755491 | -0.154529579 | -2.393457088 |
| H | -1.830421053 | 3.69166394   | -2.404818539 | C | -1.053984132 | 1.99250774   | -1.330539856 |
| C | -0.694724986 | 1.4573056    | -0.093976204 | O | -0.922526232 | 1.231281799  | -2.492480553 |
| C | -1.055334444 | 2.145993023  | 1.063759058  | C | 2.125875615  | 0.592530885  | -1.275805855 |
| C | -0.689550504 | -0.811797685 | -1.216928019 | C | 2.124206301  | 0.815237538  | 1.151203395  |
| C | -0.692314876 | -0.649752639 | 1.309396905  | C | 2.129171     | -1.396643343 | 0.130531887  |
| C | -1.045834716 | -2.151040387 | -1.063607798 | C | 3.678466429  | 0.660390573  | -1.211201276 |
| C | -1.047999547 | -1.997961942 | 1.3273652    | H | 1.677055694  | 1.57707732   | -1.395829809 |
| C | -1.053422661 | 0.151950796  | 2.391696849  | H | 1.776444934  | -0.041380106 | -2.089642393 |
| C | -1.564465794 | -0.853820546 | -3.482232    | C | 3.677651262  | 0.732117964  | 1.17504983   |
| C | -1.562515277 | -2.887314215 | -2.128040615 | H | 1.67859304   | 0.42262058   | 2.063660268  |
| C | -1.566644753 | -2.592332546 | 2.475982576  | H | 1.770036826  | 1.835650404  | 1.011585504  |
| C | -1.572987482 | -0.402666914 | 3.559717156  | H | 1.777811425  | -1.786394397 | 1.085012302  |
| C | -1.785590208 | -2.226298599 | -3.338871109 | H | 1.685011605  | -1.9925641   | -0.664922624 |
| H | -1.817383353 | -0.334019587 | -4.398085415 | C | 3.681850703  | -1.370281947 | 0.044336032  |
| H | -1.813818412 | -3.933082334 | -2.001027386 | H | 4.019641405  | 1.697954911  | -1.210162866 |
| C | -1.792892166 | -1.782274878 | 3.592225606  | H | 4.118173904  | 0.170660108  | -2.082986783 |
| H | -1.817175071 | -3.645967226 | 2.483182808  | H | 4.022861629  | 0.215046196  | 2.073194088  |
| H | -1.828510069 | 0.2297643    | 4.400932853  | H | 4.113382595  | 1.733662653  | 1.184985888  |
| H | -2.192921266 | -2.783558711 | -4.175038826 | H | 4.120329441  | -1.878114873 | 0.906237679  |
| H | -2.201755003 | -2.228622092 | 4.491792789  | H | 4.028136239  | -1.888464181 | -0.852736264 |
| C | -1.801760966 | 3.997232051  | -0.257679023 | N | 1.588589832  | 0.00276929   | 0.001659638  |
| H | -2.213120651 | 4.998366224  | -0.321876368 | N | 4.186218733  | 0.008133278  | 0.00281782   |
| O | -0.918076821 | -2.776437814 | 0.177069372  |   |              |              |              |

## 6. Transient photoluminescent decay study

**Table S15** PL decay times of **1**·pyridine and **1**·DMAP in cyclohexane at 23 °C <sup>a, b</sup>

|                         |                      | <b>1</b> ·pyridine                               | <b>1</b> ·DMAP                             |
|-------------------------|----------------------|--------------------------------------------------|--------------------------------------------|
| $\tau_{\text{prompt}}$  | under N <sub>2</sub> | 54.7 ns (@ $\lambda_{\text{Flu}} = 420$ nm)      | 3.3 ns (@ $\lambda_{\text{Flu}} = 420$ nm) |
|                         | under air            | 5.1 ns (@ $\lambda_{\text{Flu}} = 420$ nm)       | 2.8 ns (@ $\lambda_{\text{Flu}} = 420$ nm) |
| $\tau_{\text{delayed}}$ | under N <sub>2</sub> | 2.95 $\mu$ s (@ $\lambda_{\text{Flu}} = 420$ nm) | –                                          |
|                         | under air            | –                                                | –                                          |

<sup>a</sup> Conditions: **1** ( $0.5 \times 10^{-5}$  mmol), pyridine (3.0 equiv. to **1**), and DMAP (1.2 equiv. to **1**).

<sup>b</sup> Excitation source: LED-laser,  $\lambda = 280$  nm.

**Table S16** PL decay times of **1**, **1**·quinuclidine, **1**<sub>2</sub>·DABCO, and **1**·DABCO in cyclohexane at 23 °C <sup>e</sup>

|        | <b>1</b> <sup>a</sup>             | <b>1</b> ·quinuclidine <sup>b</sup> | <b>1</b> <sub>2</sub> ·DABCO <sup>c</sup> | <b>1</b> ·DABCO <sup>d</sup>      |
|--------|-----------------------------------|-------------------------------------|-------------------------------------------|-----------------------------------|
| $\tau$ | @ $\lambda_{\text{Flu}} = 380$ nm | @ $\lambda_{\text{Flu}} = 380$ nm   | @ $\lambda_{\text{Flu}} = 380$ nm         | @ $\lambda_{\text{Flu}} = 380$ nm |
|        | 4.5 ns                            | 5.5 ns                              | 4.5 ns                                    | 4.5 ns                            |
|        |                                   | @ $\lambda_{\text{Flu}} = 308$ nm   | @ $\lambda_{\text{Flu}} = 310$ nm         | @ $\lambda_{\text{Flu}} = 308$ nm |
|        |                                   | 1.6 ns                              | 0.5 ns                                    | 1.1 ns                            |

<sup>a</sup> Conditions: **1** ( $0.5 \times 10^{-5}$  mmol). <sup>b</sup> Conditions: **1** ( $0.5 \times 10^{-5}$  mmol) and quinuclidine (1.2 equiv. to **1**). <sup>c</sup> Conditions: **1** ( $1.0 \times 10^{-5}$  mmol) and DABCO (0.5 equiv. to **1**). <sup>d</sup> Conditions: **1** ( $0.5 \times 10^{-5}$  mmol) and DABCO (1.0 equiv. to **1**). <sup>e</sup> Excitation source: LED-laser,  $\lambda = 280$  nm.

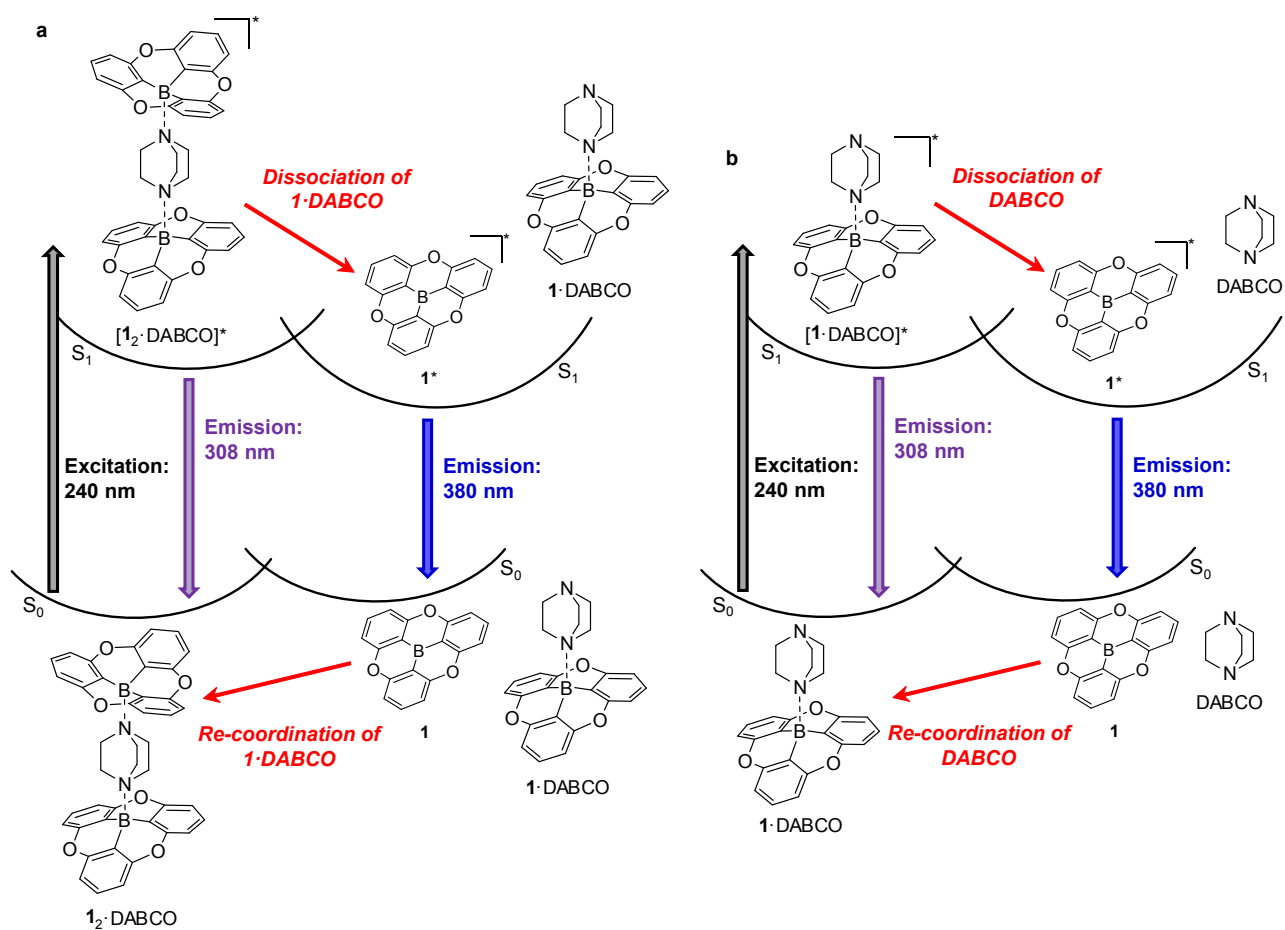

**Figure S16** Plausible mechanism and energy diagram for the dual emission behavior of (a)  $1_2 \cdot \text{DABCO}$  and (b)  $1 \cdot \text{DABCO}$ .



## 7. References

- (S1) M. Melaimi and F. P. Gabbaï, *J. Am. Chem. Soc.*, 2005, **127**, 9680.
- (S2) H. Zhao, J. H. Reibenspies and F. P. Gabbaï, *Dalton Trans.*, 2013, **42**, 608.
- (S3) J. Yuasa and S. Fukuzumi, *J. Am. Chem. Soc.*, 2006, **128**, 15976.
- (S4) J. Yuasa and S. Fukuzumi *J. Am. Chem. Soc.*, 2008, **130**, 566.
- (S5) M. J. Frisch, G. W. Trucks, H. B. Schlegel, G. E. Scuseria, M. A. Robb, J. R. Cheeseman, G. Scalmani, V. Barone, B. Mennucci, G. A. Petersson, H. Nakatsuji, M. Caricato, X. Li, H. P. Hratchian, A. F. Izmaylov, J. Bloino, G. Zheng, J. L. Sonnenberg, M. Hada, M. Ehara, K. Toyota, R. Fukuda, J. Hasegawa, M. Ishida, T. Nakajima, Y. Honda, O. Kitao, H. Nakai, T. Vreven, J. A. Montgomery Jr., J. E. Peralta, F. Ogliaro, M. Bearpark, J. J. Heyd, E. Brothers, K. N. Kudin, V. N. Staroverov, R. Kobayashi, J. Normand, K. Raghavachari, A. Rendell, J. C. Burant, S. S. Iyengar, J. Tomasi, M. Cossi, N. Rega, M. J. Millam, M. Klene, J. E. Knox, J. B. Cross, V. Bakken, C. Adamo, J. Jaramillo, R. Gomperts, R. E. Stratmann, O. Yazyev, A. J. Austin, R. Cammi, C. Pomelli, J. W. Ochterski, R. L. Martin, K. Morokuma, V. G. Zakrzewski, G. A. Voth, P. Salvador, J. J. Dannenberg, S. Dapprich, A. D. Daniels, Ö. Farkas, J. B. Foresman, J. V. Ortiz, J. Cioslowski and D. J. Fox, Gaussian 09 (Revision D.01), Gaussian, Inc., Wallingford CT, 2009.
- (S6) R. Dennington, T. Keith and J. Millam, Gauss View (Version 5), Semichem, Inc., Shawnee Mission, KS, 2009.
